1 Title: Juvenile Huntington's Disease and Other PolyQ diseases, Update on  
2 Neurodevelopmental Character and Comparative Bioinformatic Review of  
3 Transcriptomic Data

4

5 Karolina Świtońska-Kurkowska<sup>1</sup>, Bart Krist<sup>1</sup>, Joanna Maria Delimata<sup>1</sup>, Maciej Figiel<sup>1</sup>

6

7 1. Institute of Bioorganic Chemistry, Polish Academy of Sciences, Noskowskiego  
8 12/14, 61-704 Poznań, Poland

9

10 Corresponding author:

11 Maciej Figiel, Ph.D.

12 Institute of Bioorganic Chemistry

13 Polish Academy of Sciences

14 Noskowskiego 12/14

15 61-704, Poznan

16 Poland

17 Phone: +48 618528503 ext. 1150

18 E-mail: [mfigiel@ibch.poznan.pl](mailto:mfigiel@ibch.poznan.pl)

19

20

21

22

23

24

25

26

27 Keywords: Huntington's disease, juvenile, spinocerebellar ataxia, SCA, DRPLA,  
28 transcriptomics, neurodevelopment, bioinformatic analysis

29 **Abstract**

30 Polyglutamine (PolyQ) diseases are neurodegenerative disorders caused by the CAG  
31 repeat expansion mutation in affected genes resulting in toxic proteins containing a long  
32 chain of glutamines. There are nine PolyQ diseases: Huntington's disease (HD),  
33 spinocerebellar ataxias (types 1, 2, 3, 6, 7, and 17), dentatorubral-pallidoluysian atrophy  
34 (DRPLA), and spinal bulbar muscular atrophy (SBMA). In general, longer CAG  
35 expansions and longer glutamine tracts lead to earlier disease presentations in PolyQ  
36 patients. Rarely, cases of extremely long expansions are identified for PolyQ diseases,  
37 and they consistently lead to juvenile or sometimes very severe infantile-onset polyQ  
38 syndromes. In apparent contrast to the very long CAG tracts, shorter CAGs and PolyQs  
39 in proteins seems to be the evolutionary factor enhancing human cognition. Therefore,  
40 polyQ tracts in proteins can be modifiers of brain development and disease drivers, which  
41 contribute neurodevelopmental phenotypes in juvenile- and adult-onset PolyQ diseases.  
42 Therefore we performed a bioinformatics review of published RNAseq polyQ expression  
43 data resulting from the presence of polyQ genes in search of neurodevelopmental  
44 expression patterns and comparison between diseases. The expression data were collected  
45 from cell types reflecting stages of development such as iPSC, neuronal stem cell,  
46 neurons, but also the adult patients and models for PolyQ disease. Our comparative  
47 bioinformatic review highlighted several (neuro)developmental pathways and genes  
48 identified within PolyQ diseases and mouse models responsible for neural growth,  
49 synaptogenesis, and synaptic plasticity.

## 50 **1. PolyQ diseases and Juvenile Cases**

51 Polyglutamine (PolyQ) diseases are neurodegenerative disorders caused by expansion  
52 mutations giving rise to abnormally long CAG tri-nucleotide repeat tracts in affected,  
53 otherwise unrelated genes. PolyQ disorders are dominantly inherited and autosomal,  
54 except for SBMA, which is X-linked. The expanded polyQ repeats disturb the function of  
55 the proteins encoded by the genes with CAG expansion, leading to loss or gain of  
56 function (Lim et al., 2008). To date, nine PolyQ diseases were identified; namely  
57 Huntington's disease (HD), spinocerebellar ataxia (SCA) types 1, 2, 3, 6, 7, and 17,  
58 dentatorubral-pallidoluysian atrophy (DRPLA), and spinal bulbar muscular atrophy  
59 (SBMA) (Zoghbi and Orr, 2009).

60 Several PolyQ diseases may occur in younger patients, and in such cases, symptom  
61 presentation in juvenile disease usually differs from the adult form. Although the juvenile  
62 and infantile forms make up a minority of instances, the early onset, and polyQ protein  
63 domains, usually much longer than in the adult forms, hint at the developmental nature of  
64 these cases. Since the etiology of the diseases is genetic and more defined, they may help  
65 to better understand the brain development in health and disease. The first aim of this  
66 work is to obtain a broader literature overview of the juvenile and infantile PolyQ disease  
67 cases with very long CAG repeats in the context of early brain development. Since brain  
68 development is primarily related to the forming of new cell populations, differentiation,  
69 and wiring of the brain, we also looked at what is known about these processes in the  
70 context of juvenile polyQ cases. In the second part of the work, we performed a  
71 bioinformatics analysis of RNAseq data from polyQ patients and models in search of  
72 neurodevelopmental expression patterns and comparison between diseases. The  
73 expression data were collected from cell types reflecting stages of development such as  
74 iPSC, neuronal stem cell, neurons, but also the adult patients and models for PolyQ  
75 disease. In addition, thanks to a broader selection of transcriptomic data in mice  
76 containing longer CAG tracts, we are able to compare gene expression profiles between  
77 different PolyQ diseases. Still, the bias towards HD in this work results from the  
78 available data sources. However, another aim of our work is the focus on juvenile cases  
79 of polyQ disorders other than HD, possible neurodevelopmental signs in the diseases, and  
80 what we could still learn from the juvenile forms about diseased brain development.

### 81 **1.1. Juvenile and Infantile Huntington's Disease**

82 In HD, the CAG expansion mutation is located in the Huntingtin (*HTT*) gene (The  
83 Huntington's Disease Collaborative Research Group, 1993), which is crucial for neural  
84 development (reviewed in (Saudou and Humbert, 2016)). The juvenile form of HD  
85 (Juvenile onset Huntington's disease; JOHD) is defined as disease onset before the age of  
86 20 with the number of CAG repeats between 60 (Quarrell et al., 2013) and 89 (Nance and  
87 Myers, 2001; Ribaï et al., 2007), and infantile HD with very rapid onset with number of  
88 CAG repeats above 90 and more (Fusilli et al., 2018; Stout, 2018). JOHD is also marked  
89 by a more rapid disease progression, leading to an earlier death (Fusilli et al., 2018). In

90 JOHD, the symptoms are typically seizures, rigidity, and severe cognitive dysfunction  
91 (Nance and Myers, 2001; Vargas et al., 2003; Squitieri et al., 2006; Ribai et al., 2007). In  
92 cases where the onset is very early (before ten years of age, sometimes also referred to as  
93 “infantile-” or “ultra-juvenile HD”), epilepsy is also frequent (Barbeau, 1970). One of the  
94 youngest onset of JOHD and also one of the most severe presentation which has been  
95 described to date was a girl who had healthy development until 18 months of age and  
96 later at the age of 3,5 years, showed marked cerebellar atrophy. Around the age of four,  
97 choreiform movements on the right side developed. The patient was diagnosed to have  
98 265 triplet repeats on the mutant *HTT* allele and 14 on the other (Milunsky et al. 2003).  
99 Other reports have described frequent speech difficulties as early symptoms before motor  
100 problems arise (Yoon et al., 2006; Sakazume et al., 2009). Behavioral problems, such as  
101 aggression, irritability, and hyperactivity, which are often reported signs of disturbed  
102 brain development were also reported for juvenile HD (Yoon et al., 2006).

## 103 **1.2. Early Onset in PolyQ Spinocerebellar Ataxias**

104 Most severe cases of juvenile or infantile-onset were reported for SCA2 (*ATXN2*  
105 gene; ataxin-2 protein), SCA7 (*ATXN7*; Ataxin-7 protein), SCA17 (TBP gene; TATA  
106 Binding protein), and DRPLA (*ATN1* gene; atrophin-1 protein). Juvenile-onsets were  
107 also reported for SCA3/MJD with more severe presentation compared to adult forms.  
108 One of the reasons for the occurrence of very severe developmental signs may be the  
109 function of *ATXN2*, *ATXN7*, TBP, and *ATN1*, which can be summarized as a very  
110 pleiotropic and broad influence on transcriptional regulation. The function of the genes,  
111 including their impact on transcription, has been well-reviewed previously (Shen and  
112 Peterson, 2009; Yang et al., 2016; Lee et al., 2018b; Niewiadomska-Cimicka and  
113 Trottier, 2019). In SCA1 (*ATXN1* gene; Ataxin-1 protein), SCA3/MJD (*ATXN3* gene;  
114 ataxin-3), and SCA6 (*CACNA1A* gene;  $\alpha 1A$  subunit of the voltage-gated P/Q type  
115 channel), the cases with the earliest reported onset were mostly showing signs shortly  
116 before adolescence.

117 The expansion mutation in *ATXN2* in infantile cases can be very severe, reaching the  
118 range of 124 and 750 CAGs, and the range between 62 and 92 defines onset in early  
119 childhood. Typically, SCA2 presents with progressive involuntary movements of the  
120 limbs, sensorimotor neuropathy, and slowed eye movements. The abnormal eye  
121 movements and myoclonic jerks are generally the first symptoms seen in infantile and  
122 early childhood cases, with the onset of disease as early as two months of age (Moretti et  
123 al., 2004; Vinther-Jensen et al., 2013; Singh et al., 2014; Sánchez-Corona et al., 2020).  
124 Besides these, pigmentary retinopathy, seizures, dysphagia, and early death are  
125 unfortunately also standard features of juvenile SCA2 (Babovic-Vuksanovic et al., 1998;  
126 Mao et al., 2002).

127 Abnormally long polyQ tract in the ataxin 7 (*ATXN7*) gene primarily manifests as  
128 cerebellar ataxia in SCA7; however, the unique symptom is retinal degeneration, which  
129 often is the first presenting symptom (Niewiadomska-Cimicka and Trottier, 2019). In the  
130 case of *ATXN7*, healthy alleles of this gene bear up to 35 CAG repeats, whereas SCA7

131 affected individuals have more than 39 repeats (David et al., 1997; Stevanin et al., 1998).  
132 The childhood-onset of SCA7 is the consequence of more than 100 CAG repeats in the  
133 *ATXN7* gene (La Spada, 2020). Besides the classic symptoms of progressive cerebellar  
134 ataxia and retinal degeneration, the juvenile cases of SCA7 presented with absent or  
135 depressed deep tendon reflexes, which is not the case in the adult-onset type of the  
136 disease (Enevoldson et al., 1994). Other studies reported symptoms such as seizures,  
137 dysphagia, myoclonus, head lag, the absence of cough reflex, and severe hypotonia, but  
138 also symptoms more uncommon for PolyQ diseases such as cardiac involvement,  
139 hepatomegaly, multiple hemangiomas, atrial septum defect, patent ductus arteriosus, and  
140 congestive heart failure accompany ataxia (Benton et al., 1998a; Johansson et al., 1998;  
141 van de Warrenburg et al., 2001; Ansorge et al., 2004). Summarizing, infantile or early  
142 childhood SCA7 is a severe developmental syndrome with patient death reported as early  
143 as six weeks of age from unspecified cardiac and other anomalies (Neetens et al., 1990).

144 In DRPLA, the affected gene is *ATNI* (Koide et al., 1994), a transcriptional regulator  
145 involved in the brain and other organ development (Palmer et al., 2019). In the case of  
146 the *ATNI* gene, CAG repeat sizes can vary between 6 and 35 in healthy individuals,  
147 while the expansion of more than 48 repeats results in full penetrance and gives rise to  
148 the disease (Nagafuchi et al., 1994). Patients with juvenile-onset DRPLA often have  
149 progressive myoclonic epilepsy as one of the first symptoms (Tomoda et al., 1991) and  
150 the onset in first years of life with CAG repeats between 70 and 80 (Veneziano and  
151 Frontali, 1993; Hasegawa et al., 2010). Disease onset could occur as early as six months  
152 of age (with an extreme number of CAG repeats of 90 and 93), when hyperkinetic and  
153 involuntary movements, the difficulty of controlling head movements, and seizures  
154 developed (Shimojo et al., 2001).

155 SCA17 is caused by an abnormal number (more than 45-47) of CAG or CAA repeats  
156 in the TATA box-binding protein (TBP) (Gao et al., 2008; Toyoshima and Takahashi,  
157 2018). In SCA17, a small gain in CAG number in the TBP gene results in a very severe  
158 level of genetic anticipation (Maltecca et al., 2003; Rasmussen et al., 2007). For instance,  
159 CAG repeats in the range of 55-58 may cause the disease onset at age 20, 61 CAG was  
160 associated with onset at age 11, while 66 CAGs resulted in onset at the age of 3 years.  
161 (Koide et al., 1999; Maltecca et al., 2003; Rasmussen et al., 2007). Common features of  
162 the disease are ataxic gait, dysarthria, loss of muscle control, seizures, spasticity, tremor,  
163 and intellectual disability. Given the strong anticipation resulting from only low  
164 intergenerational expansion, SCA17 and TBP may strongly influence the brain  
165 development and transcriptional control of developmental genes.

166 SCA3 early childhood-onset, described in 2016, involved the range of CAG repeat  
167 between 80 and 91 (Donis et al., 2016). The progression of the disease was faster  
168 compared to adolescent cases and the signs observed were ataxia, pyramidal findings, and  
169 dystonia. In previous SCA3/MJD cohorts, the maximal number of CAGs was 86 (Todd  
170 and Paulson, 2010; Tezenas du Montcel et al., 2014).

171 SCA6 is caused by a polyQ mutation in the calcium channel gene *CACNA1A*  
172 (Zhuchenko et al., 1997). SCA6 develops due to a relatively low number of CAG repeats,

173 with 5 to 20 repeats being considered healthy and 21 repeats and above giving rise to the  
174 disease (Ishikawa et al., 1997).

175 The length of CAG repeats in infantile or childhood PolyQ diseases highly influences  
176 the onset and severity of the disease. Moreover, genetic anticipation, earlier (and more  
177 severe) disease onset in successive generations, is playing a crucial role in the majority of  
178 these disorders. (Jones et al., 2017).

179 SBMA, also referred to as Kennedy disease, is a form of spinal muscular atrophy that  
180 is recessive and X-linked, and therefore only occurs in males. The cause of SBMA is a  
181 CAG repeat expansion in exon 1 of the androgen receptor gene. Juvenile onset commonly  
182 presents with limb atrophy and gynecomastia between 8 to 15 years of age (Echaniz-  
183 Laguna et al. 2005). Unlike in other PolyQ diseases discussed here, the number of CAG  
184 repeats only poorly predicts the age of onset (muscle weakness) (Sperfeld et al. 2002;  
185 Echaniz-Laguna et al. 2005). Because of a more muscle-connected character of a disease,  
186 we do not mention it in further paragraphs. However, we included SBMA transcriptomic  
187 data in the comparative bioinformatic study.

## 188 **2. Early Brain Development in Health and PolyQ disease**

189 Normal brain development consists of cellular processes such as cell division, cell  
190 migration, cell differentiation, maturation, synaptogenesis, and apoptosis, which are  
191 precisely orchestrated by a molecular network of signaling pathways. Such orchestration  
192 is crucial for the correct generation of cellular layers, specialized neural regions, and the  
193 generation of complex neuronal wiring between brain structures. In brief, during the  
194 formation of the neural tube (neurulation) in the embryo, the neuroepithelial cells (NECs)  
195 perform symmetric cell divisions producing progenitors of different brain regions  
196 (Paridaen and Huttner, 2014). Pax6 and Emx2 signaling molecules expressed in opposing  
197 gradients from the anterior to posterior regions of the proliferative zone function as a  
198 primitive blueprint for the dividing NECs to give rise to the early structures of the  
199 forebrain, midbrain, and hindbrain (Stiles and Jernigan, 2010; *The Neurobiology of Brain  
200 and Behavioral Development*, 2018). Among others, neurulation gives rise to neural  
201 progenitors, neural crest, sensory placodes, and epidermis, all ectodermal derivatives  
202 (Haremaki et al., 2019). The appearance of these four lineages results from complex  
203 morphogenetic processes and several signaling activities, such as TGF- $\beta$  inhibition and  
204 BMP4, Wnt, and FGF signaling pathways. The signaling molecules are represented  
205 already in non-lineage committed iPSC from Huntington's disease juvenile patients and  
206 mouse models, which show a range of molecular phenotypes such as MAPK, Wnt, and  
207 p53 pathways (Szlachcic et al., 2015, 2017).

208 Early human neurulation can be recapitulated *in vitro* by self-organizing neuruloids,  
209 containing cell populations present at the stage of neural tube closure in human  
210 development (days 21-25 post-fertilization) (Haremaki et al., 2019). Interestingly such  
211 Neuruloids generated from Huntington's disease hESC demonstrated impaired  
212 neurogenesis resulting in aberrant rosette formation. In detail, HD 56Q neuruloids  
213 showed altered levels of Wnt/PCP pathway downregulation (for example, WNT5B and

214 RSPO3 specific in neuroepithelium) and RHOB and RAB5C in the neural crest. In  
215 addition, decreased expression of cytoskeleton-associated genes and actin-myosin  
216 contraction (*EVL*, *MIDI1*, *RHOQ*, and *TMEM47*) could be observed and hint toward an  
217 impairment in the actin-mediated tissue organization mechanism during neurulation  
218 (Haremake et al., 2019). In another recent study, one-third of gene changes in RNA-seq  
219 analysis on HD patient-derived iPSCs were involved in pathways regulating neuronal  
220 development and maturation. When these deregulated genes were mapped to stages of  
221 mouse striatal development, the profiles aligned mainly with earlier embryonic stages of  
222 neuronal differentiation (The HD iPSC Consortium, 2017). Moreover, sensory-motor  
223 network connectivity changes can be observed in the brains of HD patients, hinting at an  
224 effect of this PolyQ disease on brain connectivity (Pini et al., 2020).

225 During brain development, in a process called interkinetic nuclear migration coupled  
226 to cell cycle, neural progenitors keep the balance between the cell renewal of progenitors  
227 and their differentiation by controlling when and how many apical progenitor nuclei are  
228 exposed to proliferative versus neurogenic signals. Apical progenitors maintain their  
229 polarity through endocytosis and trafficking of glycans from the Golgi apparatus to the  
230 plasma membrane at the apical endfeet (Arai and Taverna, 2017). Interestingly,  
231 mislocalized expression of mHTT hinders both endosomal trafficking in apical  
232 progenitors, as well as the normal progression of cell cycle stages, leading to a shift  
233 towards more neural differentiation and away from proliferation (Barnat et al., 2020).  
234 Afterward, neuroepithelial cells start expressing glial genes and thereby begin a  
235 differentiation process into radial glial cells (RGCs). At this stage, cell migration starts to  
236 play a decisive role. Neuronal cells originating from the ventricular and subventricular  
237 zones start migrating outward in a radial fashion, using the RGCs as guideposts. Some  
238 subsets of RGCs eventually differentiate into intermediate, immature, and finally into  
239 mature neurons or astrocytes (Franco and Müller, 2013; The Neurobiology of Brain and  
240 Behavioral Development, 2018). Other cell populations migrate to the cortex during later  
241 developmental stages and include the microglia, which mostly use vessels for guidance  
242 into the forebrain. Recent reports point towards glia, particularly microglia, as essential  
243 players for cortical morphogenesis via regulation of brain wiring and interneuronal  
244 migration in the cortical wall (Silva et al., 2019).

245 Over time, successive layers of the cortical mantle form, and the progenitor cells are  
246 becoming more restricted in the cell types that they can construct. Furthermore, in this  
247 cellular maturation process, neural cells start to extend dendrites and an axon to form  
248 connections with other cells and become an integral part of a communication network  
249 (The Neurobiology of Brain and Behavioral Development, 2018).

250 In the prenatal stage of life, the further development of the brain also starts to depend  
251 on degenerative processes such as programmed cell death or apoptosis. These processes  
252 are initiated to remove the brain cells which have failed to make connections or have  
253 underutilized connections (Chan et al., 2002). Also, the underused synapses are  
254 eliminated in a process called synaptic pruning. In these stages of brain development, a  
255 transcriptional repressor complex of Ataxin1 and Capicua (ATXN1-CIC) regulates cell  
256 lineage specification and is involved in the regulation of cell proliferation (Ahmad et al.,  
257 2019). Loss of the ATXN1-CIC complex may have severe neurodevelopmental

258 consequences, as conditional knockout of either *Atxn1-Atxn1l* or *Cic* in mice lead to a  
259 decrease of cortical thickness, hyperactivity and memory deficits (Lu et al., 2017).  
260 Indeed, loss or reduction of functional ATXN1 has been observed in patients with autism  
261 spectrum disorder and attention-deficit/hyperactivity disorder (Celestino-Soper et al.,  
262 2012; Di Benedetto et al., 2013), suggesting that loss of ATXN1-CIC complexes causes a  
263 spectrum of neurobehavioral phenotypes (Lu et al., 2017). Expanded CAG tracts in  
264 ATXN1 have been shown to stimulate the proliferation of postnatal cerebellar stem cells  
265 in SCA1 mice, which tend to differentiate into GABAergic inhibitory interneurons rather  
266 than astrocytes (Edamakanti et al., 2018). These hyperproliferating cells lead to a  
267 significantly increased number of GABAergic inhibitory interneuron synaptic  
268 connections, which in turn disrupt the proper cerebellar Purkinje cell function  
269 (Edamakanti et al., 2018). On the other hand, SCA2 patient fibroblast cells exhibit higher  
270 levels of caspase-8- and caspase-9-mediated apoptotic activation than those of healthy  
271 controls, which contributes to the pathophysiology of SCA2 (Wardman et al., 2020).

272 Also, the normal function of atrophin-1 and atrophin-2 proteins are related to the  
273 development and may be associated with regulation of cell polarity and transcriptional  
274 control of progenitors, which was reviewed previously (Shen and Peterson, 2009;  
275 Mannervik, 2014). Knockdown of *Atn1* in neuronal progenitor cells (NPCs) in a rat led to  
276 severe aberrations in brain development. The study also highlighted ATN1 role as a  
277 direct target of the lysine-specific histone demethylase 1A (LSD1), which is known to  
278 have crucial developmental roles such as cortical neuronal migration or adult NPC  
279 proliferation (Zhang et al., 2014) . Similarly, TATA Binding protein as the part of the  
280 TFIID complexes may control promoter elements can regulate of developmental  
281 transcription (Ohler and Wassarman, 2010). As a general transcription factor, TBP is,  
282 directly and indirectly, involved in numerous biological pathways. Studies confirmed  
283 many cellular processes impaired by mutant TBP via either gain of function or loss of  
284 function mechanisms, such as Notch signaling, TrkA signaling, Chaperone system, ER  
285 stress response, and muscle function (Yang et al., 2016).

286 Combined with the previously mentioned roles of HTT, ATXN1, ATXN2, ATXN3,  
287 ATN1, and TBP in transcription, translation, RNA metabolism, and ubiquitin-dependent  
288 protein quality control processes, a case can be made for the adverse effect of CAG tract  
289 extension on normal gene expression and protein regulation during neural development.  
290 Therefore, it can be proposed that other late-onset degenerative diseases may also be  
291 rooted in subtle developmental derailments. Deregulation of genes involved in cell  
292 migration, cell differentiation, maturation, synaptogenesis, and apoptosis can lead to  
293 severe neurodevelopmental disorders and may also contribute to the disease pathology of  
294 PolyQ diseases.

### 295 **3. Different Brain Regions and Connections are Affected in Juvenile and Adult** 296 **PolyQ diseases**

297 PolyQ diseases affect a wide variety of brain regions, connections, and cell types in a  
298 heterogenic manner. In both juvenile- and adult-onset HD, the most affected cell types in  
299 the brain are striatal neurons (Tereshchenko et al., 2019). MRI data from JOHD cases  
300 show mostly cerebellar atrophy. The most substantial reduction in brain volume is



301 observed in the caudate, putamen, as well as in globus pallidus and thalamus. Amygdala,  
302 hippocampus, and brainstem are slightly enlarged in HD patients (Hedjoudje et al., 2018).  
303 The significant difference between HD adults and children is seen in the cerebral cortex,  
304 which is mainly unaffected in children. Histopathological findings (Latimer et al., 2017)  
305 showed mild to moderate neuron loss in the brain tissue of adult-onset patients, while no  
306 significant loss of neocortical neurons was observed in JOHD. However, in JOHD  
307 patients, a significant neostriatal neuron loss and associated astrogliosis in the striatum  
308 were observed. In both disease onsets, HTT positive intranuclear and cytoplasmic  
309 neuronal inclusions can be found in the cerebral and striatum cortex.

310 SCAs present a broad range of dysfunctions in many brain structures such as the  
311 cerebellum, basal ganglia, brainstem, cerebral cortex, spinal cord, and peripheral nerves  
312 (Benton et al., 1998b). The most characteristic feature of general SCA1 pathology is the  
313 atrophy and loss of Purkinje cells from the cerebellar cortex. As SCA1 progresses,  
314 pathology is noted in other regions of the brain, including the deep cerebellar nuclei,  
315 especially the dentate nucleus, the inferior olive, the pons, and the red nuclei (Zoghbi and  
316 Orr, 2009). Juvenile onset is characterized by severe brainstem dysfunction in addition to  
317 the cerebellar symptoms. Subnormal cortical function and rapid progression of the  
318 disease are the most outstanding features (Zoghbi et al., 1988). The most affected cell  
319 types are Purkinje neurons in both early and late-onset cases (Zoghbi et al., 1988;  
320 Naphade et al., 2019). The MRI of children with very early-onset SCA2 (age from 7 to  
321 17 months) revealed enlarged lateral ventricles, markedly small cerebellum and vermis,  
322 and associated atrophy involving the brainstem and both cerebral hemispheres. Moreover,  
323 increasing cerebral white matter loss, dysmyelination, pontocerebellar atrophy, and  
324 thinning of the corpus callosum was observed during SCA2 disease progression (Moretti  
325 et al., 2004; Ramocki et al., 2008; Paciorkowski et al., 2011; Vinther-Jensen et al., 2013;  
326 Singh et al., 2014). Histopathology findings in the cerebellar cortex showed a profound  
327 loss of Purkinje and granular neurons with severe attenuation of the molecular layer  
328 (Paciorkowski et al., 2011). Pathological examination of juvenile SCA3 patients has  
329 shown degeneration and mild gliosis of the substantia nigra, dentate, pontine and cranial  
330 nerve nuclei, anterior horns, and Clarke's columns, with the consequent loss of fibers of  
331 the superior and middle cerebellar peduncles and spinocerebellar tracts (Coutinho et al.,  
332 1982). The most affected cell type in adult SCA3 are motor neurons (Naphade et al.,  
333 2019). However, in juvenile cases of SCA3, the dorsal root and trigeminal ganglia show  
334 severe nerve cell loss (Coutinho et al., 1982). A study by Wang et al. (Wang et al. 2010)  
335 showed that neurodegeneration in SCA6 also occurs in the spinal cord. Results of an  
336 autopsy of siblings with early-onset SCA6 revealed severe neurodegeneration in the  
337 cerebellum, dentate nucleus, and olivary nuclei (Wang et al. 2010). The most affected  
338 cell type in both adult and juvenile SCA6 are Purkinje cells (Wang et al., 2010; Naphade  
339 et al., 2019). Adult SCA7 is characterized by neural loss, mainly in the cerebellum and  
340 regions of the brainstem, particularly the inferior olivary complex (Holmberg, 1998).  
341 Juvenile cases present marked atrophy of both the cerebrum and cerebellum, ventricular  
342 dilation, as well as delayed myelination for age (Benton et al., 1998b). Other reports  
343 show diffuse volume reduction of the brain and increasing atrophy of the brainstem and

344 cerebellum during SCA7 disease progression (Donis et al., 2015). The most affected cell  
345 types in SCA7 are retinal, cerebellar, and medulla oblongata neurons (Naphade et al.,  
346 2019). MRI data of 14 years old female with SCA17 showed prominent cerebellar  
347 atrophy accompanied by a dilatation of the fourth ventricle, and mild cerebral atrophy as  
348 well as dilatation of the lateral ventricles (Koide et al., 1999). It is familiar with  
349 neuroimaging studies of a family with age at onset range from very early to adult-onset  
350 that showed cerebral and cerebellar atrophy in all patients (Maltecca et al., 2003). The  
351 most affected cell types in SCA17 are Purkinje, medium spiny cortical, and dopaminergic  
352 neurons (Naphade et al., 2019).

353 DRPLA is characterized by severe neuronal loss in the dentatorubral and pallidal-  
354 subthalamic nucleus (corpus Luysii). In the juvenile type, presenting with PME  
355 syndromes, degeneration of the globus pallidus was observed to be more severe than that  
356 of the dentate nucleus. Atrophy of the brainstem and spinal cord was noticed as mild  
357 (Takeda and Takahashi 1996). MRI data of children with DRPLA also showed severe  
358 atrophy of the cerebrum and cerebellum, delayed myelination, and thin corpus callosum  
359 (Shimojo et al. 2001). In general, juvenile-onset can be characterized by more marked  
360 pallidoluysian degeneration than dentatorubral degeneration, which is opposite to late-  
361 adult onset degeneration pattern (Yamada, 2010). Histochemistry revealed nonspecific  
362 cerebral atrophy and mild neuronal loss with gliosis in the cerebral cortex (Hayashi et al.  
363 1998; Tsuchiya et al. 1998). The most affected cell types in DRPLA are striatal medium  
364 spiny neurons and pallidal neurons (Naphade et al., 2019).

#### 365 **4. Review of Juvenile- and Adult-Onset HD and other PolyQ diseases:** 366 **Deregulated Genes Overlap and GO Terms Over-Representation Analysis**

367 To obtain a broader view of the role of the very long CAG repeats and very long  
368 polyQ tracts in proteins in early brain development, we collected published  
369 transcriptomic data from human juvenile- and adult-onset HD (An et al., 2012; Feyeux et  
370 al., 2012; HD iPSC Consortium, 2012a; Chiu et al., 2015a; Ring et al., 2015; Nekrasov et  
371 al., 2016a; The HD iPSC Consortium, 2017; Mehta et al., 2018a; Świtońska et al., 2019a;  
372 Al-Dalahmah et al., 2020; Smith-Geater et al., 2020a) and also published RNA-seq or  
373 microarray data from different PolyQ mouse models (Suzuki et al., 2012; Aikawa et al.,  
374 2015; Agostoni et al., 2016; Pflieger et al., 2017; Driessen et al., 2018; Hervás-Corpión et  
375 al., 2018; Malik et al., 2019; Liu et al., 2020; Stoyas et al., 2020). The published mice  
376 data from SCA1, SCA2, SCA6, SCA7, SCA17, and DRPLA were originally collected  
377 from different brain regions, however, data from SBMA mice were collected from  
378 primary motor neurons in the spinal cord. We first focused on the publications with  
379 human data where the main aim was to compare genes dysregulated in two types of HD  
380 onset in a more detailed way. The analysis of overlapping deregulated genes (DEGs)  
381 between diseases was created and visualized with R software 3.6.3 (R Core Team 2018)  
382 and its three packages: UpsetR (Conway et al., 2017), ComplexHeatmap (Gu et al.,  
383 2016), and VennDiagram (Chen and Boutros, 2011). GO terms over-representation  
384 analysis was conducted in Cytoscape (Shannon et al. 2003) and its ClueGO app (Bindea

385 et al., 2009, 2013). An overview of data from all papers included in the analysis can be  
386 found in Supplementary Table S1. Transcriptomic data were retrieved from the Gene  
387 Expression Omnibus (GEO) repository, if possible, or from the supplementary material  
388 provided with the original publication. A cut-off of  $p$  value  $< 0.05$  was considered as  
389 significant. In two papers, with much higher number of identified genes, we set a cut-off  
390 of  $p$  value  $< 0.001$  (HD iPSC Consortium, 2012a; The HD iPSC Consortium, 2017).

391

#### 392 **4.2. Previously Published Transcriptomic Data Show Molecular Downregulation in** 393 **Juvenile-Onset Human HD and Highlights Organism Morphogenesis,** 394 **Neurodevelopment, and Synaptic Transmission**

395 First, we assessed the overlap of DEGs between different cell types and between  
396 different types of HD disease onset (Supplementary Figure 1 and 2). We focused on data  
397 from embryonic stem cells (ESC), induced pluripotent stem cells (iPSC), neural stem  
398 cells (NSC), and neurons. With such a collection, we were able to check whether there  
399 are genes downregulated in HD from the very beginning and at the same time through the  
400 whole “neurodifferentiation axis”. The analyses revealed two genes shared between  
401 iPSC, NSC, and neurons in data from JOHD, *TBX15*, and *HOXB6* (Supplementary Figure  
402 1A-B and Supplementary Table S1). These two genes encode transcription factors that  
403 regulate a variety of developmental processes. We identified 12, and 22 genes shared  
404 between iPSC and NSC with neurons, respectively, in JOHD (Supplementary Figure 1A-  
405 B and Supplementary Table S1). The firstly mentioned 12 genes are again connected in  
406 the majority with the regulation of transcription. The NSC/neurons shared genes are  
407 involved in developmental biology and particularly on embryonic skeletal system  
408 morphogenesis. When it comes to adult-onset HD, apart from a small group of 11 genes  
409 shared between ESC and NSC, we didn’t identify genes downregulated in every cell type  
410 (Supplementary Figure 1C and Supplementary Table S1). Altogether, the created Venn  
411 diagrams highlight the fact that in JOHD, molecular processes and genes downregulated  
412 on very early stages of organism development may have a direct impact on later brain  
413 and neurons formation, hence resulting in a much earlier disease onset. The UpSetR  
414 diagram did not show much of an overlap of downregulated genes between juvenile and  
415 adult HD (Supplementary Figure 1A). Nonetheless, 27 genes were identified to be DEGs  
416 in neurons obtained from both disease onset type (Supplementary Figure 1D-E). Those  
417 are involved, among others, in the cerebral cortex GABAergic interneuron  
418 differentiation, which aberration leads to an imbalance between excitatory and inhibitory  
419 signaling, affecting motor and cognitive processes during HD pathogenesis (Hsu et al.,  
420 2018). We also analyzed which biological processes include genes downregulated only in  
421 juvenile or only in adult HD. This resulted in a big cluster of various early  
422 neurodevelopmental processes, organism morphogenesis, and signal transduction for  
423 JOHD (Figure 1), which was not the case for adult HD. Besides some neuronal GO terms  
424 connected with genes downregulated in adult HD, no obvious cluster of connected  
425 processes was identified. Particularly interesting were the four papers with transcriptomic

426 data on human juvenile-onset HD neurons and four articles concerning human adult-  
427 onset HD neurons, which we compared (HD iPSC Consortium, 2012b, 2012b; Chiu et al.,  
428 2015b; Nekrasov et al., 2016b; Mehta et al., 2018b; Świtońska et al., 2019b; Al-  
429 Dalahmah et al., 2020; Smith-Geater et al., 2020b). A total of 27 downregulated and 48  
430 upregulated genes in neurons were found to be shared between juvenile-onset and adult-  
431 onset HD (Supplementary Figure 1D & 2D). A total of 758 downregulated and 632  
432 upregulated genes in neurons were found to be unique for juvenile-onset HD, and an  
433 additional 108 downregulated and 451 upregulated genes in neurons were unique to  
434 adult-onset HD (Supplementary Figure 1D & 2D). A full list of common and uniquely  
435 deregulated genes can be found in the supplemental data of this work (Supplementary  
436 Table S1).

437 After the assessment of gene overlap, we performed pathway analysis with  
438 ClueGO app (Cytoscape). We found that the DEGs uniquely downregulated in juvenile-  
439 onset HD neurons are significantly involved in developmental processes, such as  
440 Dopaminergic Neurogenesis (PW:0000394), Differentiation Pathway (WP2848), spinal  
441 cord development (GO:0021510), Neuronal System (R-HSA-112316.7), Neural Crest  
442 Differentiation (WP2064), presynaptic active zone assembly (GO:1904071),  
443 anterior/posterior axon guidance (GO:0033564, metencephalon development  
444 (GO:0022037), Potassium Channels (WP2669), and DNA-binding transcription activator  
445 activity, RNA polymerase II-specific (GO:0001228) Besides developmental processes, a  
446 substantial subset of the uniquely downregulated genes in JOHD-derived neurons is  
447 involved in synaptic processes, regulation of synaptic transmission, glutamatergic  
448 (GO:0051967 and GO:0051968), Cholinergic synapse (GO:0098981), neurotransmitter  
449 secretion (GO:0007269), axon terminus (GO:0043679), positive regulation of dopamine  
450 secretion (GO:0033603), regulation of neuronal synaptic plasticity (GO:0048168), and  
451 regulation of dendrite morphogenesis (GO:0048814). In Supplementary Table S2, we  
452 present a list of the most significantly involved pathways in uniquely downregulated  
453 DEGs in JOHD or adult-onset HD, grouped by biological processes, and highlight the  
454 input genes found in those pathways. The GO terms unique to neurons of adult-onset HD  
455 patients suggest a more developed, more mature cellular expression pattern compared to  
456 the juvenile-onset HD.

457 Inspired by transcriptomic data generated by Haremaki and colleagues (Haremaki  
458 et al. 2019) we decided to extend our bioinformatic study with one additional  
459 comparative analysis. As previously mentioned, Haremaki and colleagues succeeded in  
460 recapitulating human neurulation by generating neuruloids harboring neural progenitors,  
461 neural crest, sensory placode and epidermis. These self-organizing structures provide a  
462 great opportunity to study the developmental aspects of many human diseases, especially  
463 HD. Having the insight into single-cell transcriptomics from healthy and HD neuruloids,  
464 we decided to compare these data with the ones collected for our comparative study. We  
465 compared down- and upregulated genes from our cohort to each group of markers  
466 specific to a particular cell population identified in scRNA-seq of healthy neuruloids,  
467 neuroepithelial identity NE1 and NE2, neurons, skin, neural crest (NC), placode and U1  
468 neurons, and also to a list of differentially expressed genes in NE and NC populations in

469 HD neuruloids (Supplementary Table S4). We identified a significant number of genes  
470 shared between markers for neuruloid neurons population and downregulated genes in  
471 stem cell-derived neurons in juvenile-onset HD (Supplementary Table S4). This is  
472 coherent with GO term over-representation analysis and again highlights the great  
473 downregulation of crucial genes and thus many biological processes during the very early  
474 neurogenesis.

475

### 476 **4.3. HD and SCA1 Seems to Have More Common Transcriptionally Dysregulated** 477 **Genes Than Other PolyQ diseases in Mice**

478 Being rare diseases, more abundant data can be drawn from mice models of  
479 PolyQ diseases. An extensive review of polyQ mouse models can be found in the works  
480 of Figiel et al. and Switonski et al. (Figiel et al., 2012; Switonski et al., 2012). The high  
481 CAG repeat numbers is needed in polyQ mouse models to express a disease phenotype,  
482 therefore they may be considered as polyQ models of juvenile-onset type. Therefore, the  
483 second data collection for this bioinformatic review was derived from nine publications  
484 concerning mouse brain transcriptomics in several PolyQ diseases, such as HD, SCA1,  
485 SCA2, SCA6, SCA7, SCA17, DRPLA, and SBMA (Suzuki et al., 2012; Aikawa et al.,  
486 2015; Agostoni et al., 2016; Pflieger et al., 2017; Driessen et al., 2018; Hervás-Corpión et  
487 al., 2018; Malik et al., 2019; Liu et al., 2020; Stoyas et al., 2020). (Supplementary Table  
488 S1). After adjusting *p-value* cut-off, the following number of genes was collected: 697  
489 downregulated and 167 upregulated DEGs in HD and respectively 643 and 144 in SCA1,  
490 134 and 80 in SCA2, 493 and 349 in SCA6, 64 and 27 in SCA7, 246 and 187 in SCA17,  
491 250 and 162 in SBMA, 225 and 318 in DRPLA (Figures 2 and 3 and Supplementary  
492 Table S1). The largest subset of commonly shared DEGs were 87 downregulated genes  
493 common between HD and SCA1 (Figure 2B, Supplementary Table S3). ClueGo analysis  
494 revealed the involvement of DEGs in Amphetamine addiction (KEGG hsa05031), Opioid  
495 signaling (WP1978), neuronal cell body membrane (GO:0032809), and integrin cell  
496 surface markers (WP1833) (Figure 2C, Supplementary Table S5). SBMA stood out as the  
497 least common of the PolyQ diseases, with 235 out of 250 downregulated and 152 out of  
498 162 upregulated genes being uniquely expressed in SBMA only (Figure 2A and 3A).

499 Two genes were shared between five of the PolyQ diseases (G Protein Subunit  
500 Gamma 13 (*Gng13*) in SCA1, 2, 7, 17 and DRPLA, and Glutamate receptor delta two  
501 interacting protein (*Grid2ip*) in HD, Sca1, 2, 7, and 17). *Gng13* encodes the gamma  
502 subunit of heterotrimeric G proteins, which are signal transducers for the 7-  
503 transmembrane-helix G protein-coupled receptors (Li et al., 2006). *Grid2ip* is a Purkinje  
504 cell-specific postsynaptic protein, where it may serve to link Glutamate receptor delta 2  
505 (GRID2) with the actin cytoskeleton and various signaling molecules. GRID2 has been  
506 reported to play crucial roles in synaptogenesis and synaptic plasticity and may control  
507 GRID2 signaling in Purkinje cells (Matsuda et al., 2006). Other notable DEGs are  
508 Regulator Of G Protein Signaling 8 (*Rgs8*), Regulator Of G Protein Signaling 16 (*Rgs16*),  
509 and Purkinje Cell Protein 4 (*Pcp4*) commonly deregulated in HD, SCA1, DRPLA, and

510 either SCA6 (*Rgs16*) or SCA7 (*Rgs8* and *Pcp4*). These DEGs are all involved in  
511 calmodulin-binding, which acts as part of a calcium signal transduction pathway and has  
512 roles in cellular mechanisms including metabolism, synaptic plasticity, nerve growth,  
513 smooth muscle contraction (Hyman and Pfenninger, 1985; Xia and Storm, 2005;  
514 Kleerekoper and Putkey, 2009; Mouton-Liger et al., 2011; Wang and Putkey, 2016)

515 Finally, several Cerebellin (*Cbln1*, 2, 3 and 4), Matrix Metalloproteinases (*Mmp8*, 9,  
516 16, 17, and 20), and Collagen (*Col5a1*, *Col6a4*, *Col11a1*, *Col18a1*, *Col20a1*, *Col25a1*)  
517 isoforms are downregulated in compared PolyQ diseases. While no commonly  
518 deregulated isoform was found, the downregulation of these proteins is important for  
519 synaptic activity and the modulation of the extracellular matrix, further hinting to an  
520 important role of WM alterations in PolyQ diseases.

521

## 522 **5. Discussion and Concluding Remarks**

523 Although the juvenile and infantile forms make up a minority of PolyQ disease cases,  
524 the early onset makes these diseases an example of neurodevelopmental disorders.  
525 Indeed, the results of our bioinformatic study of the available transcriptomic data reveal  
526 that uniquely dysregulated genes in juvenile-onset HD neurons are involved in several  
527 (neuro)developmental pathways leading to early symptoms in patients. Our group and  
528 others have previously demonstrated a neurodevelopmental component in HD  
529 pathogenesis, and further exciting evidence was delivered only very recently (Kubera et  
530 al., 2019; Barnat et al., 2020). Moreover, HTT has an impact on the cortical volume and  
531 brain connections, leading to higher general intelligence (IQ) in people with larger (sub-  
532 disease) PolyQ repeats (Lee et al., 2017, 2018a). An increasing number of studies created  
533 a body of evidence for transcriptional modulators of polyglutamine tracts not only in HD  
534 but also in other PolyQ diseases, like SCAs, mentioned in this manuscript (Paulson et al.,  
535 2017; Buijsen et al., 2019).

536 Our analysis combines numerous data sets on polyQ transcriptomics into one  
537 collection and demonstrates several neurodevelopmental transcriptomic commonalities to  
538 the diseases. There are genes unique in JOHD neurons and individual genes that are  
539 downregulated in 4 or more of the independent PolyQ diseases mouse models. The genes  
540 were involved in neural growth, synaptogenesis, and synaptic plasticity, and extracellular  
541 matrix remodeling, suggesting a critical role of brain connections and WM changes roles  
542 in PolyQ disease pathology. *HTT*, *ATNI*, *TBP*, and Ataxins have previously been  
543 identified as transcriptional regulators (Benn et al., 2008; Kumar et al., 2014; Gao et al.,  
544 2019) therefore, our results are in agreement with the previously formulated hypothesis  
545 that transcriptional dysregulation is a solid feature of several polyglutamine diseases  
546 (Helmlinger et al., 2006).

547 Polyglutamine diseases are relatively rare, and therefore, only a limited number of  
548 publications with transcriptomic data were available for our comparative study. Therefore  
549 more transcriptomic research in PolyQ disease is needed to understand better the  
550 mechanistic aspects of the disease pathology. Moreover, studies that will focus on the

551 unique differences between juvenile- and adult-onset would be of interest, as the longer  
552 CAG repeat mutations augment the transcriptional potential of the affected protein, which  
553 may leading to compromised of neurodevelopment.  
554

## 555 **AUTHOR CONTRIBUTIONS**

556 K.Ś-K., B.K., J.D and M. Figiel wrote the manuscript. K.Ś-K performed all  
557 bioinformatics associated with R software and ClueGO analyses of data. All authors read  
558 and approved the final manuscript. M. Figiel was responsible for concept of this review  
559 and for obtaining funding.  
560

## 561 **ACKNOWLEDGMENTS**

562 This work was supported by the grant from the National Science Centre (grant  
563 number 2018/31/B/NZ3/03621).

## 564 **ADDITIONAL INFORMATION**

565 The authors declare no competing or financial interests.  
566

## 567 **References:**

- 568 Agostoni, E., Michelazzi, S., Maurutto, M., Carnemolla, A., Ciani, Y., Vatta, P., et al. (2016).  
569 Effects of Pin1 Loss in Hdh(Q111) Knock-in Mice. *Front Cell Neurosci* 10, 110.  
570 doi:10.3389/fncel.2016.00110.
- 571 Ahmad, S. T., Rogers, A. D., Chen, M. J., Dixit, R., Adnani, L., Frankiw, L. S., et al. (2019). Capicua  
572 regulates neural stem cell proliferation and lineage specification through control of Ets  
573 factors. *Nat Commun* 10, 2000. doi:10.1038/s41467-019-09949-6.
- 574 Aikawa, T., Mogushi, K., Iijima-Tsutsui, K., Ishikawa, K., Sakurai, M., Tanaka, H., et al. (2015). Loss  
575 of MyD88 alters neuroinflammatory response and attenuates early Purkinje cell loss in a  
576 spinocerebellar ataxia type 6 mouse model. *Hum Mol Genet* 24, 4780–4791.  
577 doi:10.1093/hmg/ddv202.
- 578 Al-Dalahmah, O., Sosunov, A. A., Shaik, A., Ofori, K., Liu, Y., Vonsattel, J. P., et al. (2020). Single-  
579 nucleus RNA-seq identifies Huntington disease astrocyte states. *acta neuropathol*  
580 *commun* 8, 19. doi:10.1186/s40478-020-0880-6.
- 581 An, M. C., Zhang, N., Scott, G., Montoro, D., Wittkop, T., Mooney, S., et al. (2012). Genetic  
582 Correction of Huntington’s Disease Phenotypes in Induced Pluripotent Stem Cells. *Cell*  
583 *Stem Cell* 11, 253–263. doi:10.1016/j.stem.2012.04.026.

- 584 Ansorge, O., Giunti, P., Michalik, A., Van Broeckhoven, C., Harding, B., Wood, N., et al. (2004).  
585 Ataxin-7 aggregation and ubiquitination in infantile SCA7 with 180 CAG repeats. *Ann.*  
586 *Neurol.* 56, 448–452. doi:10.1002/ana.20230.
- 587 Arai, Y., and Taverna, E. (2017). Neural Progenitor Cell Polarity and Cortical Development. *Front.*  
588 *Cell. Neurosci.* 11, 384. doi:10.3389/fncel.2017.00384.
- 589 Babovic-Vuksanovic, D., Snow, K., Patterson, M. C., and Michels, V. V. (1998). Spinocerebellar  
590 ataxia type 2 (SCA 2) in an infant with extreme CAG repeat expansion. *Am. J. Med.*  
591 *Genet.* 79, 383–387.
- 592 Barbeau, A. (1970). Parental ascent in the juvenile form of Huntington's chorea. *Lancet* 2, 937.  
593 doi:10.1016/s0140-6736(70)92119-7.
- 594 Barnat, M., Capizzi, M., Aparicio, E., Boluda, S., Wennagel, D., Kacher, R., et al. (2020).  
595 Huntington's disease alters human neurodevelopment. *Science* 369, 787–793.  
596 doi:10.1126/science.aax3338.
- 597 Benn, C. L., Sun, T., Sadri-Vakili, G., McFarland, K. N., DiRocco, D. P., Yohrling, G. J., et al. (2008).  
598 Huntingtin modulates transcription, occupies gene promoters in vivo, and binds directly  
599 to DNA in a polyglutamine-dependent manner. *J. Neurosci.* 28, 10720–10733.  
600 doi:10.1523/JNEUROSCI.2126-08.2008.
- 601 Benton, C. S., de Silva, R., Rutledge, S. L., Bohlega, S., Ashizawa, T., and Zoghbi, H. Y. (1998a).  
602 Molecular and clinical studies in SCA-7 define a broad clinical spectrum and the infantile  
603 phenotype. *Neurology* 51, 1081–1086. doi:10.1212/wnl.51.4.1081.
- 604 Benton, C. S., de Silva, R., Rutledge, S. L., Bohlega, S., Ashizawa, T., and Zoghbi, H. Y. (1998b).  
605 Molecular and clinical studies in SCA-7 define a broad clinical spectrum and the infantile  
606 phenotype. *Neurology* 51, 1081–1086. doi:10.1212/WNL.51.4.1081.
- 607 Bindea, G., Galon, J., and Mlecnik, B. (2013). CluePedia Cytoscape plugin: pathway insights using  
608 integrated experimental and in silico data. *Bioinformatics* 29, 661–663.  
609 doi:10.1093/bioinformatics/btt019.
- 610 Bindea, G., Mlecnik, B., Hackl, H., Charoentong, P., Tosolini, M., Kirilovsky, A., et al. (2009).  
611 ClueGO: a Cytoscape plug-in to decipher functionally grouped gene ontology and  
612 pathway annotation networks. *Bioinformatics* 25, 1091–1093.  
613 doi:10.1093/bioinformatics/btp101.
- 614 Buijsen, R. A. M., Toonen, L. J. A., Gardiner, S. L., and van Roon-Mom, W. M. C. (2019). Genetics,  
615 Mechanisms, and Therapeutic Progress in Polyglutamine Spinocerebellar Ataxias.  
616 *Neurotherapeutics* 16, 263–286. doi:10.1007/s13311-018-00696-y.
- 617 Celestino-Soper, P. B., Skinner, C., Schroer, R., Eng, P., Shenai, J., Nowaczyk, M. M., et al. (2012).  
618 Deletions in chromosome 6p22.3-p24.3, including ATXN1, are associated with  
619 developmental delay and autism spectrum disorders. *Mol Cytogenet* 5, 17.  
620 doi:10.1186/1755-8166-5-17.



- 621 Chan, W. Y., Lorke, D. E., Tiu, S. C., and Yew, D. T. (2002). Proliferation and apoptosis in the  
622 developing human neocortex. *Anat. Rec.* 267, 261–276. doi:10.1002/ar.10100.
- 623 Chen, H., and Boutros, P. C. (2011). VennDiagram: a package for the generation of highly-  
624 customizable Venn and Euler diagrams in R. *BMC Bioinformatics* 12, 35.  
625 doi:10.1186/1471-2105-12-35.
- 626 Chiu, F.-L., Lin, J.-T., Chuang, C.-Y., Chien, T., Chen, C.-M., Chen, K.-H., et al. (2015a). Elucidating  
627 the role of the A2A adenosine receptor in neurodegeneration using neurons derived  
628 from Huntington’s disease iPSCs. *Hum Mol Genet* 24, 6066–6079.  
629 doi:10.1093/hmg/ddv318.
- 630 Chiu, F.-L., Lin, J.-T., Chuang, C.-Y., Chien, T., Chen, C.-M., Chen, K.-H., et al. (2015b). Elucidating  
631 the role of the A2A adenosine receptor in neurodegeneration using neurons derived  
632 from Huntington’s disease iPSCs. *Hum Mol Genet* 24, 6066–6079.  
633 doi:10.1093/hmg/ddv318.
- 634 Conway, J. R., Lex, A., and Gehlenborg, N. (2017). UpSetR: an R package for the visualization of  
635 intersecting sets and their properties. *Bioinformatics* 33, 2938–2940.  
636 doi:10.1093/bioinformatics/btx364.
- 637 Coutinho, P., Guimarães, A., and Scaravilli, F. (1982). The pathology of Machado-Joseph disease.  
638 Report of a possible homozygous case. *Acta Neuropathol* 58, 48–54.  
639 doi:10.1007/BF00692697.
- 640 David, G., Abbas, N., Stevanin, G., Dürr, A., Yvert, G., Cancel, G., et al. (1997). Cloning of the SCA7  
641 gene reveals a highly unstable CAG repeat expansion. *Nat. Genet.* 17, 65–70.  
642 doi:10.1038/ng0997-65.
- 643 Di Benedetto, D., Di Vita, G., Romano, C., Giudice, M. L., Vitello, G. A., Zingale, M., et al. (2013).  
644 6p22.3 deletion: report of a patient with autism, severe intellectual disability and  
645 electroencephalographic anomalies. *Mol Cytogenet* 6, 4. doi:10.1186/1755-8166-6-4.
- 646 Donis, K. C., Mattos, E. P., Silva, A. A., Furtado, G. V., Saraiva-Pereira, M. L., Jardim, L. B., et al.  
647 (2015). Infantile spinocerebellar ataxia type 7: Case report and a review of the literature.  
648 *Journal of the Neurological Sciences* 354, 118–121. doi:10.1016/j.jns.2015.04.040.
- 649 Donis, K. C., Saute, J. A. M., Krum-Santos, A. C., Furtado, G. V., Mattos, E. P., Saraiva-Pereira, M.  
650 L., et al. (2016). Spinocerebellar ataxia type 3/Machado-Joseph disease starting before  
651 adolescence. *Neurogenetics* 17, 107–113. doi:10.1007/s10048-016-0473-5.
- 652 Driessen, T. M., Lee, P. J., and Lim, J. (2018). Molecular pathway analysis towards understanding  
653 tissue vulnerability in spinocerebellar ataxia type 1. *eLife* 7, e39981.  
654 doi:10.7554/eLife.39981.
- 655 Edamakanti, C. R., Do, J., Didonna, A., Martina, M., and Opal, P. (2018). Mutant ataxin1 disrupts  
656 cerebellar development in spinocerebellar ataxia type 1. *Journal of Clinical Investigation*  
657 128, 2252–2265. doi:10.1172/JCI96765.

- 658 Enevoldson, T. P., Sanders, M. D., and Harding, A. E. (1994). Autosomal dominant cerebellar  
659 ataxia with pigmentary macular dystrophy. A clinical and genetic study of eight families.  
660 *Brain* 117 ( Pt 3), 445–460. doi:10.1093/brain/117.3.445.
- 661 Feyeux, M., Bourgois-Rocha, F., Redfern, A., Giles, P., Lefort, N., Aubert, S., et al. (2012). Early  
662 transcriptional changes linked to naturally occurring Huntington’s disease mutations in  
663 neural derivatives of human embryonic stem cells. *Hum Mol Genet* 21, 3883–3895.  
664 doi:10.1093/hmg/dds216.
- 665 Figiel, M., Szlachcic, W. J., Switonski, P. M., Gabka, A., and Krzyzosiak, W. J. (2012). Mouse  
666 models of polyglutamine diseases: review and data table. Part I. *Mol. Neurobiol.* 46,  
667 393–429. doi:10.1007/s12035-012-8315-4.
- 668 Franco, S. J., and Müller, U. (2013). Shaping our minds: stem and progenitor cell diversity in the  
669 mammalian neocortex. *Neuron* 77, 19–34. doi:10.1016/j.neuron.2012.12.022.
- 670 Fusilli, C., Migliore, S., Mazza, T., Consoli, F., De Luca, A., Barbagallo, G., et al. (2018). Biological  
671 and clinical manifestations of juvenile Huntington’s disease: a retrospective analysis.  
672 *Lancet Neurol* 17, 986–993. doi:10.1016/S1474-4422(18)30294-1.
- 673 Gao, R., Chakraborty, A., Geater, C., Pradhan, S., Gordon, K. L., Snowden, J., et al. (2019). Mutant  
674 huntingtin impairs PNKP and ATXN3, disrupting DNA repair and transcription. *Elife* 8.  
675 doi:10.7554/eLife.42988.
- 676 Gao, R., Matsuura, T., Coolbaugh, M., Zühlke, C., Nakamura, K., Rasmussen, A., et al. (2008).  
677 Instability of expanded CAG/CAA repeats in spinocerebellar ataxia type 17. *Eur. J. Hum.*  
678 *Genet.* 16, 215–222. doi:10.1038/sj.ejhg.5201954.
- 679 Gu, Z., Eils, R., and Schlesner, M. (2016). Complex heatmaps reveal patterns and correlations in  
680 multidimensional genomic data. *Bioinformatics* 32, 2847–2849.  
681 doi:10.1093/bioinformatics/btw313.
- 682 Haremaki, T., Metzger, J. J., Rito, T., Ozair, M. Z., Etoc, F., and Brivanlou, A. H. (2019). Self-  
683 organizing neuruloids model developmental aspects of Huntington’s disease in the  
684 ectodermal compartment. *Nat Biotechnol* 37, 1198–1208. doi:10.1038/s41587-019-  
685 0237-5.
- 686 Hasegawa, A., Ikeuchi, T., Koike, R., Matsubara, N., Tsuchiya, M., Nozaki, H., et al. (2010). Long-  
687 term disability and prognosis in dentatorubral-pallidoluysian atrophy: a correlation with  
688 CAG repeat length. *Mov Disord* 25, 1694–1700. doi:10.1002/mds.23167.
- 689 HD iPSC Consortium (2012a). Induced pluripotent stem cells from patients with Huntington’s  
690 disease show CAG-repeat-expansion-associated phenotypes. *Cell Stem Cell* 11, 264–278.  
691 doi:10.1016/j.stem.2012.04.027.
- 692 HD iPSC Consortium (2012b). Induced pluripotent stem cells from patients with Huntington’s  
693 disease show CAG-repeat-expansion-associated phenotypes. *Cell Stem Cell* 11, 264–278.  
694 doi:10.1016/j.stem.2012.04.027.

- 695 Hedjoudje, A., Nicolas, G., Goldenberg, A., Vanhulle, C., Dumant-Forrest, C., Deverrière, G., et al.  
696 (2018). Morphological features in juvenile Huntington disease associated with cerebellar  
697 atrophy — magnetic resonance imaging morphometric analysis. *Pediatr Radiol* 48,  
698 1463–1471. doi:10.1007/s00247-018-4167-z.
- 699 Helmlinger, D., Tora, L., and Devys, D. (2006). Transcriptional alterations and chromatin  
700 remodeling in polyglutamine diseases. *Trends in Genetics* 22, 562–570.  
701 doi:10.1016/j.tig.2006.07.010.
- 702 Hervás-Corpión, I., Guiretti, D., Alcaraz-Iborra, M., Olivares, R., Campos-Caro, A., Barco, Á., et al.  
703 (2018). Early alteration of epigenetic-related transcription in Huntington’s disease  
704 mouse models. *Sci Rep* 8, 9925. doi:10.1038/s41598-018-28185-4.
- 705 Holmberg, M. (1998). Spinocerebellar ataxia type 7 (SCA7): a neurodegenerative disorder with  
706 neuronal intranuclear inclusions. *Human Molecular Genetics* 7, 913–918.  
707 doi:10.1093/hmg/7.5.913.
- 708 Hsu, Y.-T., Chang, Y.-G., and Chern, Y. (2018). Insights into GABAergic system alteration in  
709 Huntington’s disease. *Open Biol* 8. doi:10.1098/rsob.180165.
- 710 Hyman, C., and Pfenninger, K. H. (1985). Intracellular regulators of neuronal sprouting:  
711 calmodulin-binding proteins of nerve growth cones. *The Journal of Cell Biology* 101,  
712 1153–1160. doi:10.1083/jcb.101.3.1153.
- 713 Ishikawa, K., Tanaka, H., Saito, M., Ohkoshi, N., Fujita, T., Yoshizawa, K., et al. (1997). Japanese  
714 families with autosomal dominant pure cerebellar ataxia map to chromosome 19p13.1-  
715 p13.2 and are strongly associated with mild CAG expansions in the spinocerebellar  
716 ataxia type 6 gene in chromosome 19p13.1. *Am. J. Hum. Genet.* 61, 336–346.  
717 doi:10.1086/514867.
- 718 Johansson, J., Forsgren, L., Sandgren, O., Brice, A., Holmgren, G., and Holmberg, M. (1998).  
719 Expanded CAG repeats in Swedish spinocerebellar ataxia type 7 (SCA7) patients: effect  
720 of CAG repeat length on the clinical manifestation. *Hum. Mol. Genet.* 7, 171–176.  
721 doi:10.1093/hmg/7.2.171.
- 722 Jones, L., Houlden, H., and Tabrizi, S. J. (2017). DNA repair in the trinucleotide repeat disorders.  
723 *The Lancet Neurology* 16, 88–96. doi:10.1016/S1474-4422(16)30350-7.
- 724 Kleerekoper, Q. K., and Putkey, J. A. (2009). PEP-19, an intrinsically disordered regulator of  
725 calmodulin signaling. *J. Biol. Chem.* 284, 7455–7464. doi:10.1074/jbc.M808067200.
- 726 Koide, R., Ikeuchi, T., Onodera, O., Tanaka, H., Igarashi, S., Endo, K., et al. (1994). Unstable  
727 expansion of CAG repeat in hereditary dentatorubral-pallidoluysian atrophy (DRPLA).  
728 *Nat. Genet.* 6, 9–13. doi:10.1038/ng0194-9.
- 729 Koide, R., Kobayashi, S., Shimohata, T., Ikeuchi, T., Maruyama, M., Saito, M., et al. (1999). A  
730 neurological disease caused by an expanded CAG trinucleotide repeat in the TATA-  
731 binding protein gene: a new polyglutamine disease? *Hum. Mol. Genet.* 8, 2047–2053.  
732 doi:10.1093/hmg/8.11.2047.

- 733 Kubera, K. M., Schmitgen, M. M., Hirjak, D., Wolf, R. C., and Orth, M. (2019). Cortical  
734 neurodevelopment in pre-manifest Huntington's disease. *Neuroimage Clin* 23, 101913.  
735 doi:10.1016/j.nicl.2019.101913.
- 736 Kumar, A., Vaish, M., and Ratan, R. R. (2014). Transcriptional dysregulation in Huntington's  
737 disease: a failure of adaptive transcriptional homeostasis. *Drug Discov. Today* 19, 956–  
738 962. doi:10.1016/j.drudis.2014.03.016.
- 739 La Spada, A. R. (2020). "Spinocerebellar Ataxia Type 7," in *GeneReviews*<sup>®</sup>, eds. M. P. Adam, H. H.  
740 Ardinger, R. A. Pagon, S. E. Wallace, L. J. Bean, K. Stephens, et al. (Seattle (WA):  
741 University of Washington, Seattle). Available at:  
742 <http://www.ncbi.nlm.nih.gov/books/NBK1256/> [Accessed November 23, 2020].
- 743 Latimer, C. S., Flanagan, M. E., Cimino, P. J., Jayadev, S., Davis, M., Hoffer, Z. S., et al. (2017).  
744 Neuropathological Comparison of Adult Onset and Juvenile Huntington's Disease with  
745 Cerebellar Atrophy: A Report of a Father and Son. *JHD* 6, 337–348. doi:10.3233/JHD-  
746 170261.
- 747 Lee, J. K., Conrad, A., Epping, E., Mathews, K., Magnotta, V., Dawson, J. D., et al. (2018a). Effect  
748 of Trinucleotide Repeats in the Huntington's Gene on Intelligence. *EBioMedicine* 31, 47–  
749 53. doi:10.1016/j.ebiom.2018.03.031.
- 750 Lee, J. K., Ding, Y., Conrad, A. L., Cattaneo, E., Epping, E., Mathews, K., et al. (2017). Sex-specific  
751 effects of the Huntington gene on normal neurodevelopment. *J. Neurosci. Res.* 95, 398–  
752 408. doi:10.1002/jnr.23980.
- 753 Lee, J., Kim, M., Itoh, T. Q., and Lim, C. (2018b). Ataxin-2: A versatile posttranscriptional  
754 regulator and its implication in neural function. *WIREs RNA* 9, e1488.  
755 doi:<https://doi.org/10.1002/wrna.1488>.
- 756 Li, Z., Benard, O., and Margolskee, R. F. (2006). Ggamma13 interacts with PDZ domain-  
757 containing proteins. *J. Biol. Chem.* 281, 11066–11073. doi:10.1074/jbc.M600113200.
- 758 Lim, J., Crespo-Barreto, J., Jafar-Nejad, P., Bowman, A. B., Richman, R., Hill, D. E., et al. (2008).  
759 Opposing effects of polyglutamine expansion on native protein complexes contribute to  
760 SCA1. *Nature* 452, 713–718. doi:10.1038/nature06731.
- 761 Liu, Q., Huang, S., Yin, P., Yang, S., Zhang, J., Jing, L., et al. (2020). Cerebellum-enriched protein  
762 INPP5A contributes to selective neuropathology in mouse model of spinocerebellar  
763 ataxias type 17. *Nature Communications* 11, 1101. doi:10.1038/s41467-020-14931-8.
- 764 Lu, H.-C., Tan, Q., Rousseaux, M. W. C., Wang, W., Kim, J.-Y., Richman, R., et al. (2017).  
765 Disruption of the ATXN1-CIC complex causes a spectrum of neurobehavioral phenotypes  
766 in mice and humans. *Nat Genet* 49, 527–536. doi:10.1038/ng.3808.
- 767 Malik, B., Devine, H., Patani, R., La Spada, A. R., Hanna, M. G., and Greensmith, L. (2019). Gene  
768 expression analysis reveals early dysregulation of disease pathways and links Chmp7 to  
769 pathogenesis of spinal and bulbar muscular atrophy. *Scientific Reports* 9, 3539.  
770 doi:10.1038/s41598-019-40118-3.

- 771 Maltecca, F., Filla, A., Castaldo, I., Coppola, G., Fragassi, N. A., Carella, M., et al. (2003).  
772 Intergenerational instability and marked anticipation in SCA-17. *Neurology* 61, 1441–  
773 1443. doi:10.1212/01.wnl.0000094123.09098.a0.
- 774 Mannervik, M. (2014). Control of Drosophila embryo patterning by transcriptional co-regulators.  
775 *Exp Cell Res* 321, 47–57. doi:10.1016/j.yexcr.2013.10.010.
- 776 Mao, R., Aylsworth, A. S., Potter, N., Wilson, W. G., Breningstall, G., Wick, M. J., et al. (2002).  
777 Childhood-onset ataxia: testing for large CAG-repeats in SCA2 and SCA7. *Am. J. Med.*  
778 *Genet.* 110, 338–345. doi:10.1002/ajmg.10467.
- 779 Matsuda, K., Matsuda, S., Gladding, C. M., and Yuzaki, M. (2006). Characterization of the delta2  
780 glutamate receptor-binding protein delphilin: Splicing variants with differential  
781 palmitoylation and an additional PDZ domain. *J. Biol. Chem.* 281, 25577–25587.  
782 doi:10.1074/jbc.M602044200.
- 783 Mehta, S. R., Tom, C. M., Wang, Y., Bresee, C., Rushton, D., Mathkar, P. P., et al. (2018a). Human  
784 Huntington’s Disease iPSC-Derived Cortical Neurons Display Altered Transcriptomics,  
785 Morphology, and Maturation. *Cell Reports* 25, 1081-1096.e6.  
786 doi:10.1016/j.celrep.2018.09.076.
- 787 Mehta, S. R., Tom, C. M., Wang, Y., Bresee, C., Rushton, D., Mathkar, P. P., et al. (2018b). Human  
788 Huntington’s Disease iPSC-Derived Cortical Neurons Display Altered Transcriptomics,  
789 Morphology, and Maturation. *Cell Reports* 25, 1081–1096.e6.  
790 doi:10.1016/j.celrep.2018.09.076.
- 791 Moretti, P., Blazo, M., Garcia, L., Armstrong, D., Lewis, R. A., Roa, B., et al. (2004).  
792 Spinocerebellar ataxia type 2 (SCA2) presenting with ophthalmoplegia and  
793 developmental delay in infancy. *Am. J. Med. Genet. A* 124A, 392–396.  
794 doi:10.1002/ajmg.a.20428.
- 795 Mouton-Liger, F., Thomas, S., Rattenbach, R., Magnol, L., Larigaldie, V., Ledru, A., et al. (2011).  
796 PCP4 (PEP19) overexpression induces premature neuronal differentiation associated  
797 with Ca(2+) /calmodulin-dependent kinase II- $\delta$  activation in mouse models of Down  
798 syndrome. *J. Comp. Neurol.* 519, 2779–2802. doi:10.1002/cne.22651.
- 799 Nagafuchi, S., Yanagisawa, H., Sato, K., Shirayama, T., Ohsaki, E., Bundo, M., et al. (1994).  
800 Dentatorubral and pallidolusian atrophy expansion of an unstable CAG trinucleotide on  
801 chromosome 12p. *Nat. Genet.* 6, 14–18. doi:10.1038/ng0194-14.
- 802 Nance, M. A., and Myers, R. H. (2001). Juvenile onset Huntington’s disease--clinical and research  
803 perspectives. *Ment Retard Dev Disabil Res Rev* 7, 153–157. doi:10.1002/mrdd.1022.
- 804 Naphade, S., Tshilenge, K.-T., and Ellerby, L. M. (2019). Modeling Polyglutamine Expansion  
805 Diseases with Induced Pluripotent Stem Cells. *Neurotherapeutics* 16, 979–998.  
806 doi:10.1007/s13311-019-00810-8.

- 807 Neetens, A., Martin, J. J., Libert, J., and Den Ende, P. V. (1990). Autosomal dominant cone  
808 dystrophy-cerebellar atrophy (ADCoCA) (modified ADCA Harding II). *Neuro-*  
809 *Ophthalmology* 10, 261–275. doi:10.3109/01658109008997294.
- 810 Nekrasov, E. D., Vigont, V. A., Klyushnikov, S. A., Lebedeva, O. S., Vassina, E. M., Bogomazova, A.  
811 N., et al. (2016a). Manifestation of Huntington’s disease pathology in human induced  
812 pluripotent stem cell-derived neurons. *Mol Neurodegener* 11, 27. doi:10.1186/s13024-  
813 016-0092-5.
- 814 Nekrasov, E. D., Vigont, V. A., Klyushnikov, S. A., Lebedeva, O. S., Vassina, E. M., Bogomazova, A.  
815 N., et al. (2016b). Manifestation of Huntington’s disease pathology in human induced  
816 pluripotent stem cell-derived neurons. *Mol Neurodegener* 11, 27. doi:10.1186/s13024-  
817 016-0092-5.
- 818 Niewiadomska-Cimicka, A., and Trottier, Y. (2019). Molecular Targets and Therapeutic Strategies  
819 in Spinocerebellar Ataxia Type 7. *Neurotherapeutics* 16, 1074–1096.  
820 doi:10.1007/s13311-019-00778-5.
- 821 Ohler, U., and Wassarman, D. A. (2010). Promoting developmental transcription. *Development*  
822 137, 15–26. doi:10.1242/dev.035493.
- 823 Paciorkowski, A. R., Shafrir, Y., Hrivnak, J., Patterson, M. C., Tennison, M. B., Clark, H. B., et al.  
824 (2011). Massive expansion of SCA2 with autonomic dysfunction, retinitis pigmentosa,  
825 and infantile spasms. *Neurology* 77, 1055–1060. doi:10.1212/WNL.0b013e31822e5627.
- 826 Palmer, E. E., Hong, S., Al Zahrani, F., Hashem, M. O., Aleisa, F. A., Ahmed, H. M. J., et al. (2019).  
827 De Novo Variants Disrupting the HX Repeat Motif of ATN1 Cause a Recognizable Non-  
828 Progressive Neurocognitive Syndrome. *Am. J. Hum. Genet.* 104, 542–552.  
829 doi:10.1016/j.ajhg.2019.01.013.
- 830 Paridaen, J. T., and Huttner, W. B. (2014). Neurogenesis during development of the vertebrate  
831 central nervous system. *EMBO Rep* 15, 351–364. doi:10.1002/embr.201438447.
- 832 Paulson, H. L., Shakkottai, V. G., Clark, H. B., and Orr, H. T. (2017). Polyglutamine spinocerebellar  
833 ataxias — from genes to potential treatments. *Nat Rev Neurosci* 18, 613–626.  
834 doi:10.1038/nrn.2017.92.
- 835 Pflieger, L. T., Dansithong, W., Paul, S., Scoles, D. R., Figueroa, K. P., Meera, P., et al. (2017).  
836 Gene co-expression network analysis for identifying modules and functionally enriched  
837 pathways in SCA2. *Hum Mol Genet* 26, 3069–3080. doi:10.1093/hmg/ddx191.
- 838 Pini, L., Jacquemot, C., Cagnin, A., Meneghello, F., Semenza, C., Mantini, D., et al. (2020).  
839 Aberrant brain network connectivity in presymptomatic and manifest Huntington’s  
840 disease: A systematic review. *Hum Brain Mapp* 41, 256–269. doi:10.1002/hbm.24790.
- 841 Quarrell, O. W. J., Nance, M. A., Nopoulos, P., Paulsen, J. S., Smith, J. A., and Squitieri, F. (2013).  
842 Managing juvenile Huntington’s disease. *Neurodegener Dis Manag* 3.  
843 doi:10.2217/nmt.13.18.

- 844 Ramocki, M. B., Chapiesski, L., McDonald, R. O., Fernandez, F., and Malphrus, A. D. (2008).  
845 Spinocerebellar Ataxia Type 2 Presenting With Cognitive Regression in Childhood. *J Child*  
846 *Neurol* 23, 999–1001. doi:10.1177/0883073808315622.
- 847 Rasmussen, A., De Biase, I., Fragoso-Benítez, M., Macías-Flores, M. A., Yescas, P., Ochoa, A., et  
848 al. (2007). Anticipation and intergenerational repeat instability in spinocerebellar ataxia  
849 type 17: Anticipation in SCA17. *Ann Neurol*. 61, 607–610. doi:10.1002/ana.21139.
- 850 Ribaï, P., Nguyen, K., Hahn-Barma, V., Gourfinkel-An, I., Vidailhet, M., Legout, A., et al. (2007).  
851 Psychiatric and cognitive difficulties as indicators of juvenile huntington disease onset in  
852 29 patients. *Arch. Neurol*. 64, 813–819. doi:10.1001/archneur.64.6.813.
- 853 Ring, K. L., An, M. C., Zhang, N., O'Brien, R. N., Ramos, E. M., Gao, F., et al. (2015). Genomic  
854 Analysis Reveals Disruption of Striatal Neuronal Development and Therapeutic Targets  
855 in Human Huntington's Disease Neural Stem Cells. *Stem Cell Reports* 5, 1023–1038.  
856 doi:10.1016/j.stemcr.2015.11.005.
- 857 Sakazume, S., Yoshinari, S., Oguma, E., Utsuno, E., Ishii, T., Narumi, Y., et al. (2009). A patient  
858 with early onset Huntington disease and severe cerebellar atrophy. *Am. J. Med. Genet. A*  
859 149A, 598–601. doi:10.1002/ajmg.a.32707.
- 860 Sánchez-Corona, J., Ramirez-Garcia, S. A., Castañeda-Cisneros, G., Gutiérrez-Rubio, S. A., Volpini,  
861 V., Sánchez-Garcia, D. M., et al. (2020). A clinical report of the massive CAG repeat  
862 expansion in spinocerebellar ataxia type 2: Severe onset in a Mexican child and review  
863 previous cases. *Genet Mol Biol* 43. doi:10.1590/1678-4685-GMB-2019-0325.
- 864 Saudou, F., and Humbert, S. (2016). The Biology of Huntingtin. *Neuron* 89, 910–926.  
865 doi:10.1016/j.neuron.2016.02.003.
- 866 Shen, Y., and Peterson, A. S. (2009). Atrophins' emerging roles in development and  
867 neurodegenerative disease. *Cell Mol Life Sci* 66, 437–446. doi:10.1007/s00018-008-  
868 8403-9.
- 869 Shimojo, Y., Osawa, Y., Fukumizu, M., Hanaoka, S., Tanaka, H., Ogata, F., et al. (2001). Severe  
870 infantile dentatorubral pallidoluysian atrophy with extreme expansion of CAG repeats.  
871 *Neurology* 56, 277–278. doi:10.1212/wnl.56.2.277.
- 872 Silva, C. G., Peyre, E., and Nguyen, L. (2019). Cell migration promotes dynamic cellular  
873 interactions to control cerebral cortex morphogenesis. *Nat Rev Neurosci* 20, 318–329.  
874 doi:10.1038/s41583-019-0148-y.
- 875 Singh, A., Faruq, M., Mukerji, M., Dwivedi, M. K., Pruthi, S., and Kapoor, S. (2014). Infantile  
876 Onset Spinocerebellar Ataxia 2 (SCA2): A Clinical Report With Review of Previous Cases.  
877 *J Child Neurol* 29, 139–144. doi:10.1177/0883073813509015.
- 878 Smith-Geater, C., Hernandez, S. J., Lim, R. G., Adam, M., Wu, J., Stocksedale, J. T., et al. (2020a).  
879 Aberrant Development Corrected in Adult-Onset Huntington's Disease iPSC-Derived  
880 Neuronal Cultures via WNT Signaling Modulation. *Stem Cell Reports* 14, 406–419.  
881 doi:10.1016/j.stemcr.2020.01.015.

- 882 Smith-Geater, C., Hernandez, S. J., Lim, R. G., Adam, M., Wu, J., Stocksdales, J. T., et al. (2020b).  
883 Aberrant Development Corrected in Adult-Onset Huntington's Disease iPSC-Derived  
884 Neuronal Cultures via WNT Signaling Modulation. *Stem Cell Reports* 14, 406–419.  
885 doi:10.1016/j.stemcr.2020.01.015.
- 886 Squitieri, F., Frati, L., Ciarmiello, A., Lastoria, S., and Quarrell, O. (2006). Juvenile Huntington's  
887 disease: Does a dosage-effect pathogenic mechanism differ from the classical adult  
888 disease? *Mechanisms of Ageing and Development* 127, 208–212.  
889 doi:10.1016/j.mad.2005.09.012.
- 890 Stevanin, G., Giunti, P., Belal, G. D., Dürr, A., Ruberg, M., Wood, N., et al. (1998). De novo  
891 expansion of intermediate alleles in spinocerebellar ataxia 7. *Hum. Mol. Genet.* 7, 1809–  
892 1813. doi:10.1093/hmg/7.11.1809.
- 893 Stiles, J., and Jernigan, T. L. (2010). The basics of brain development. *Neuropsychol Rev* 20, 327–  
894 348. doi:10.1007/s11065-010-9148-4.
- 895 Stout, J. C. (2018). Juvenile Huntington's disease: left behind? *Lancet Neurol* 17, 932–933.  
896 doi:10.1016/S1474-4422(18)30334-X.
- 897 Stoyas, C. A., Bushart, D. D., Switonski, P. M., Ward, J. M., Alaghatta, A., Tang, M., et al. (2020).  
898 Nicotinamide Pathway-Dependent Sirt1 Activation Restores Calcium Homeostasis to  
899 Achieve Neuroprotection in Spinocerebellar Ataxia Type 7. *Neuron* 105, 630–644.e9.  
900 doi:10.1016/j.neuron.2019.11.019.
- 901 Suzuki, K., Zhou, J., Sato, T., Takao, K., Miyagawa, T., Oyake, M., et al. (2012). DRPLA transgenic  
902 mouse substrains carrying single copy of full-length mutant human DRPLA gene with  
903 variable sizes of expanded CAG repeats exhibit CAG repeat length- and age-dependent  
904 changes in behavioral abnormalities and gene expression profiles. *Neurobiology of*  
905 *Disease* 46, 336–350. doi:10.1016/j.nbd.2012.01.014.
- 906 Świtońska, K., Szlachcic, W. J., Handschuh, L., Wojciechowski, P., Marczak, Ł., Stelmaszczuk, M.,  
907 et al. (2019a). Identification of Altered Developmental Pathways in Human Juvenile HD  
908 iPSC With 71Q and 109Q Using Transcriptome Profiling. *Front. Cell. Neurosci.* 12.  
909 doi:10.3389/fncel.2018.00528.
- 910 Świtońska, K., Szlachcic, W. J., Handschuh, L., Wojciechowski, P., Marczak, Ł., Stelmaszczuk, M.,  
911 et al. (2019b). Identification of Altered Developmental Pathways in Human Juvenile HD  
912 iPSC With 71Q and 109Q Using Transcriptome Profiling. *Front. Cell. Neurosci.* 12.  
913 doi:10.3389/fncel.2018.00528.
- 914 Switonski, P. M., Szlachcic, W. J., Gabka, A., Krzyzosiak, W. J., and Figiel, M. (2012). Mouse  
915 models of polyglutamine diseases in therapeutic approaches: review and data table.  
916 Part II. *Mol. Neurobiol.* 46, 430–466. doi:10.1007/s12035-012-8316-3.
- 917 Szlachcic, W. J., Switonski, P. M., Krzyzosiak, W. J., Figlerowicz, M., and Figiel, M. (2015).  
918 Huntington disease iPSCs show early molecular changes in intracellular signaling, the  
919 expression of oxidative stress proteins and the p53 pathway. *Dis Model Mech* 8, 1047–  
920 1057. doi:10.1242/dmm.019406.



- 921 Szlachcic, W. J., Wiatr, K., Trzeciak, M., Figlerowicz, M., and Figiel, M. (2017). The Generation of  
922 Mouse and Human Huntington Disease iPSCs Suitable for In vitro Studies on  
923 Huntingtin Function. *Front Mol Neurosci* 10, 253. doi:10.3389/fnmol.2017.00253.
- 924 Tereshchenko, A., Magnotta, V., Epping, E., Mathews, K., Espe-Pfeifer, P., Martin, E., et al.  
925 (2019). Brain structure in juvenile-onset Huntington disease. *Neurology* 92, e1939–  
926 e1947. doi:10.1212/WNL.00000000000007355.
- 927 Tezenas du Montcel, S., Durr, A., Bauer, P., Figueroa, K. P., Ichikawa, Y., Brussino, A., et al.  
928 (2014). Modulation of the age at onset in spinocerebellar ataxia by CAG tracts in various  
929 genes. *Brain* 137, 2444–2455. doi:10.1093/brain/awu174.
- 930 The HD iPSC Consortium (2017). Developmental alterations in Huntington’s disease neural cells  
931 and pharmacological rescue in cells and mice. *Nat Neurosci* 20, 648–660.  
932 doi:10.1038/nn.4532.
- 933 The Huntington’s Disease Collaborative Research Group (1993). A novel gene containing a  
934 trinucleotide repeat that is expanded and unstable on Huntington’s disease  
935 chromosomes. *Cell* 72, 971–983.
- 936 The Neurobiology of Brain and Behavioral Development (2018). Elsevier doi:10.1016/C2015-0-  
937 00695-5.
- 938 Todd, P. K., and Paulson, H. L. (2010). RNA-mediated neurodegeneration in repeat expansion  
939 disorders. *Ann. Neurol.* 67, 291–300. doi:10.1002/ana.21948.
- 940 Tomoda, A., Ikezawa, M., Ohtani, Y., Miike, T., and Kumamoto, T. (1991). Progressive myoclonus  
941 epilepsy: dentato-rubro-pallido-luysian atrophy (DRPLA) in childhood. *Brain Dev.* 13,  
942 266–269. doi:10.1016/s0387-7604(12)80061-1.
- 943 Toyoshima, Y., and Takahashi, H. (2018). “Spinocerebellar Ataxia Type 17 (SCA17),” in  
944 *Polyglutamine Disorders Advances in Experimental Medicine and Biology.*, eds. C.  
945 Nóbrega and L. Pereira de Almeida (Cham: Springer International Publishing), 219–231.  
946 doi:10.1007/978-3-319-71779-1\_10.
- 947 van de Warrenburg, B. P., Frenken, C. W., Ausems, M. G., Kleefstra, T., Sinke, R. J., Knoers, N. V.,  
948 et al. (2001). Striking anticipation in spinocerebellar ataxia type 7: the infantile  
949 phenotype. *J. Neurol.* 248, 911–914. doi:10.1007/s004150170082.
- 950 Vargas, A. P., Carod-Artal, F. J., Bomfim, D., Vázquez-Cabrera, C., and Dantas-Barbosa, C. (2003).  
951 Unusual Early-Onset Huntington’s Disease. *J Child Neurol* 18, 429–432.  
952 doi:10.1177/08830738030180061301.
- 953 Veneziano, L., and Frontali, M. (1993). “DRPLA,” in *GeneReviews*<sup>®</sup>, eds. M. P. Adam, H. H.  
954 Ardinger, R. A. Pagon, S. E. Wallace, L. J. Bean, K. Stephens, et al. (Seattle (WA):  
955 University of Washington, Seattle). Available at:  
956 <http://www.ncbi.nlm.nih.gov/books/NBK1491/> [Accessed November 24, 2020].

- 957 Vinther-Jensen, T., Ek, J., Duno, M., Skovby, F., Hjermand, L. E., Nielsen, J. E., et al. (2013). Germ-  
958 line CAG repeat instability causes extreme CAG repeat expansion with infantile-onset  
959 spinocerebellar ataxia type 2. *Eur. J. Hum. Genet.* 21, 626–629.  
960 doi:10.1038/ejhg.2012.231.
- 961 Wang, X., and Putkey, J. A. (2016). PEP-19 modulates calcium binding to calmodulin by  
962 electrostatic steering. *Nat Commun* 7, 13583. doi:10.1038/ncomms13583.
- 963 Wang, X., Wang, H., Xia, Y., Jiang, H., Shen, L., Wang, S., et al. (2010). A neuropathological study  
964 at autopsy of early onset spinocerebellar ataxia 6. *Journal of Clinical Neuroscience* 17,  
965 751–755. doi:10.1016/j.jocn.2009.10.007.
- 966 Xia, Z., and Storm, D. R. (2005). The role of calmodulin as a signal integrator for synaptic  
967 plasticity. *Nat Rev Neurosci* 6, 267–276. doi:10.1038/nrn1647.
- 968 Yamada, M. (2010). Dentatorubral-pallidoluysian atrophy (DRPLA): The 50th Anniversary of  
969 Japanese Society of Neuropathology. *Neuropathology*, no-no. doi:10.1111/j.1440-  
970 1789.2010.01120.x.
- 971 Yang, S., Li, X.-J., and Li, S. (2016). Molecular mechanisms underlying Spinocerebellar Ataxia 17  
972 (SCA17) pathogenesis. *Rare Dis* 4. doi:10.1080/21675511.2016.1223580.
- 973 Yoon, G., Kramer, J., Zanko, A., Guzijan, M., Lin, S., Foster-Barber, A., et al. (2006). Speech and  
974 language delay are early manifestations of juvenile-onset Huntington disease. *Neurology*  
975 67, 1265–1267. doi:10.1212/01.wnl.0000238390.86304.4e.
- 976 Zhang, F., Xu, D., Yuan, L., Sun, Y., and Xu, Z. (2014). Epigenetic regulation of Atrophin1 by lysine-  
977 specific demethylase 1 is required for cortical progenitor maintenance. *Nat Commun* 5,  
978 5815. doi:10.1038/ncomms6815.
- 979 Zhuchenko, O., Bailey, J., Bonnen, P., Ashizawa, T., Stockton, D. W., Amos, C., et al. (1997).  
980 Autosomal dominant cerebellar ataxia (SCA6) associated with small polyglutamine  
981 expansions in the alpha 1A-voltage-dependent calcium channel. *Nat. Genet.* 15, 62–69.  
982 doi:10.1038/ng0197-62.
- 983 Zoghbi, H. Y., and Orr, H. T. (2009). Pathogenic mechanisms of a polyglutamine-mediated  
984 neurodegenerative disease, spinocerebellar ataxia type 1. *J. Biol. Chem.* 284, 7425–  
985 7429. doi:10.1074/jbc.R800041200.
- 986 Zoghbi, H. Y., Pollack, M. S., Lyons, L. A., Ferrell, R. E., Daiger, S. P., and Beaudet, A. L. (1988).  
987 Spinocerebellar ataxia: Variable age of onset and linkage to human leukocyte antigen in  
988 a large kindred. *Ann Neurol.* 23, 580–584. doi:10.1002/ana.410230609.

989

990 **FIGURES:**

991

992 **FIG 1.** Uniquely downregulated DEGs in JOHD are involved in developmental  
993 processes, organism morphogenesis, and signal transduction. A pie-chart with ClueGO  
994 analysis of genes downregulated only in neurons from juvenile-onset HD patients was  
995 used to visualize the biological processes they are involved in. Top dysregulated  
996 processes for each bigger cluster were listed.

997 **FIG 2.** Overlap of significantly downregulated genes from mice transcriptomic data from  
998 different PolyQ diseases. (A) UpsetR analysis was used to see the overlap between  
999 downregulated genes identified in different PolyQ diseases. Venn diagrams visualizing  
1000 the overlap between downregulated genes in HD and SCA1; (B) and for overlapping  
1001 genes downregulated in SCA1 and DRPLA (D). ClueGO analysis was used to visualize  
1002 the biological processes in which the commonly downregulated genes between HD and  
1003 SCA1 (C) and between SCA1 and DRPLA (E) are involved.

1004 **FIG 3.** Overlap of significantly upregulated genes from mice transcriptomic data from  
1005 different PolyQ diseases. (A) UpsetR analysis was used to see the overlap between  
1006 upregulated genes identified in different PolyQ diseases. (B) Venn diagrams visualizing  
1007 the overlap between genes upregulated in SCA7 and SCA17. (C) ClueGO analysis for  
1008 genes commonly upregulated in SCA7 and SCA17.

1009  
1010

#### 1011 **SUPPLEMENTARY DATA:**

1012  
1013 **SUPPLEMENTARY FIGURE S1.** Analysis of Juvenile- and adult Huntington disease  
1014 transcriptomic data demonstrates mostly specific sets of downregulated genes for each  
1015 type of onset. (A) UpsetR graph showing the intersection between genes identified in the  
1016 different HD cell types. Venn diagrams were used to visualize the overlap between genes  
1017 from juvenile HD iPSC, NSC, and neurons (B), for genes from adult HD iPSC, NSC, and  
1018 neurons (C), and for genes from juvenile and adult neurons (D). Interestingly, although  
1019 both the juvenile and adult neurons contain a mutation in HTT, their transcriptomic  
1020 dysregulated genes vastly differ, showing just 27 genes in common. These commonly  
1021 downregulated genes are visualized with a CluGO plot (E).

1022 **SUPPLEMENTARY FIGURE S2.** Analysis of Juvenile- and adult Huntington disease  
1023 transcriptomic data demonstrates mostly specific sets of upregulated genes for each type  
1024 of onset. (A) UpsetR graph showing the overlap between genes identified in the different  
1025 HD cell types. Venn diagrams were used to visualize the overlap between genes from  
1026 juvenile HD iPSC, NSC, and neurons (B), for genes from adult HD iPSC, NSC, and  
1027 neurons (C), and for genes from juvenile and adult neurons (D). Similar to Figure S1D,  
1028 the juvenile HD and adult HD neurons vastly differ in dysregulated genes, showing only  
1029 48 genes in common. These commonly downregulated genes are visualized with a  
1030 CluGO plot (E).

1031 **SUPPLEMENTARY TABLE S1.** Transcriptomic data included in the comparative  
1032 bioinformatic study. Data were retrieved from the Gene Expression Omnibus (GEO)  
1033 repository, if possible, or from the supplementary material provided with the publication.  
1034 A cut-off of p-value < 0.05 was considered as significant. In two publications, with a  
1035 greater number of identified genes, we set a cut-off of p-value < 0.001.

1036 **SUPPLEMENTARY TABLE S2.** Biological processes, molecular function, and cellular  
1037 components ClueGO analysis for genes downregulated in neurons from juvenile-onset  
1038 HD patients (stem cell-derived or collected post-mortem). Top downregulated processes  
1039 were visualized in Figure 3.

1040 **SUPPLEMENTARY TABLE S3.** Biological processes, molecular function, and cellular  
1041 components ClueGO analysis for common transcriptionally downregulated genes in HD  
1042 and SCA1 mice.

1043 **SUPPLEMENTARY TABLE S4.** Comparison analysis between scRNA-seq data from  
1044 neuruloid paper (Haremaki et al., 2019) and human data collected for our comparative  
1045 study. We compared down- and upregulated genes from our cohort to each group of  
1046 markers specific to a particular cell population identified in scRNA-seq of healthy  
1047 neuruloids, neuroepithelial identity NE1 and NE2, neurons, skin, neural crest (NC),  
1048 placode and U1 neurons, and also to a list of differentially expressed genes in NE and NC  
1049 populations in HD neuruloids.

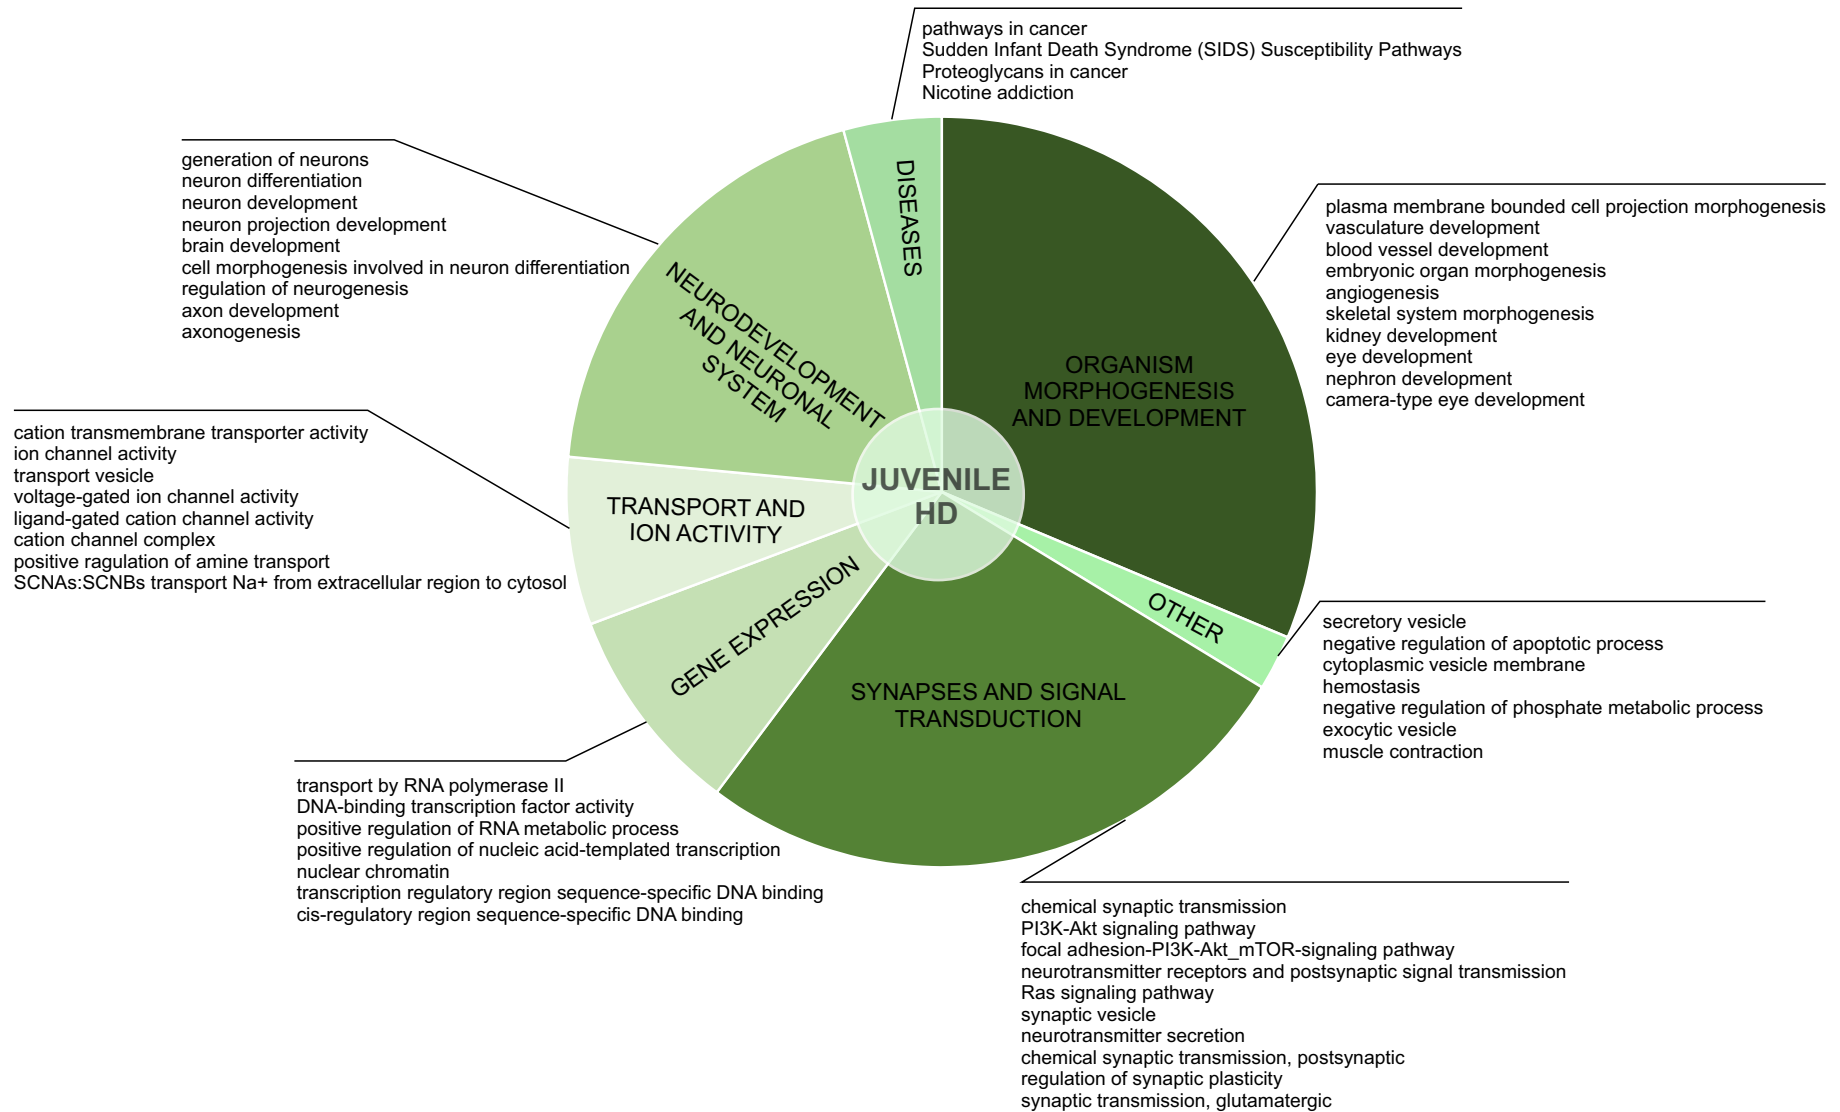

**FIG. 1.** Uniquely downregulated DEGs in JOHD are involved in developmental processes, organism morphogenesis, and signal transduction. A pie-chart with ClueGO analysis of genes downregulated only in neurons from juvenile-onset HD patients was used to visualize the biological processes they are involved in. Top dysregulated processes for each bigger cluster were listed.

**A**

bioRxiv preprint doi: <https://doi.org/10.1101/2021.02.19.431958>; this version posted February 20, 2021. The copyright holder for this preprint (which was not certified by peer review) is the author/funder. All rights reserved. No reuse allowed without permission.

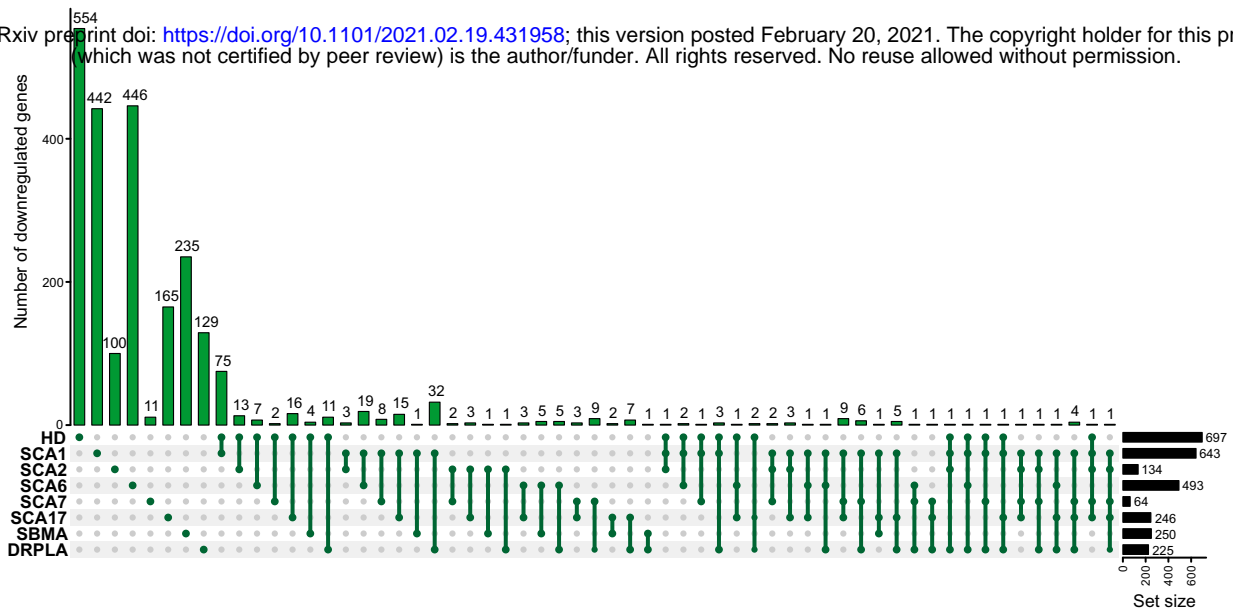**B**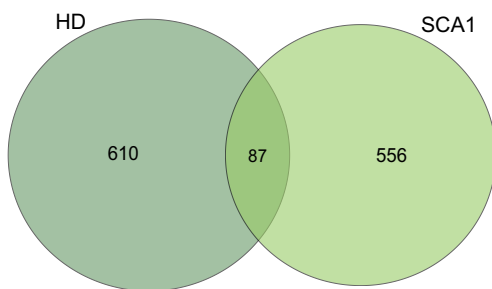**C**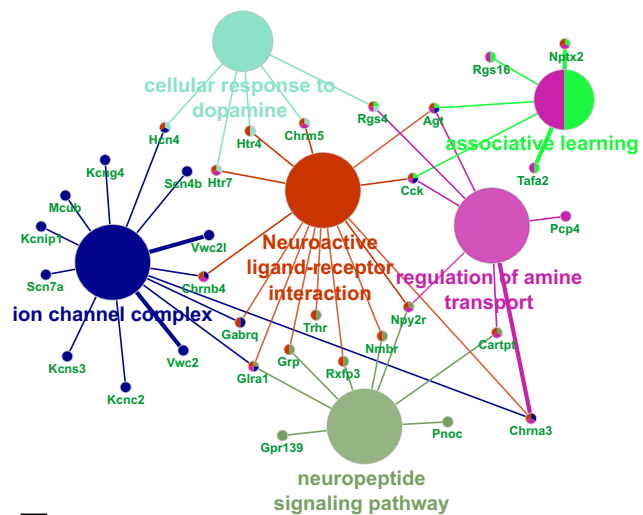**D**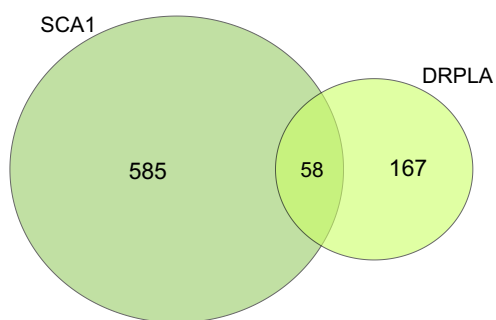**E**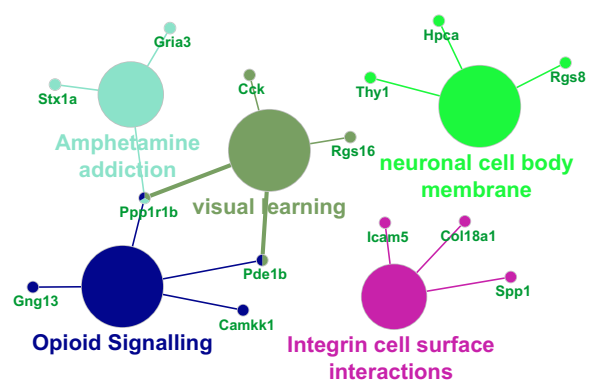

**FIG. 2.** Overlap of significantly downregulated genes from mice transcriptomic data from different PolyQ diseases. (A) UpSetR analysis was used to see the overlap between downregulated genes identified in different PolyQ diseases. Venn diagrams visualizing the overlap between downregulated genes in HD and SCA1; (B) and for overlapping genes downregulated in SCA1 and DRPLA (D). ClueGO analysis was used to visualize the biological processes in which the commonly downregulated genes between HD and SCA1 (C) and between SCA1 and DRPLA (E)

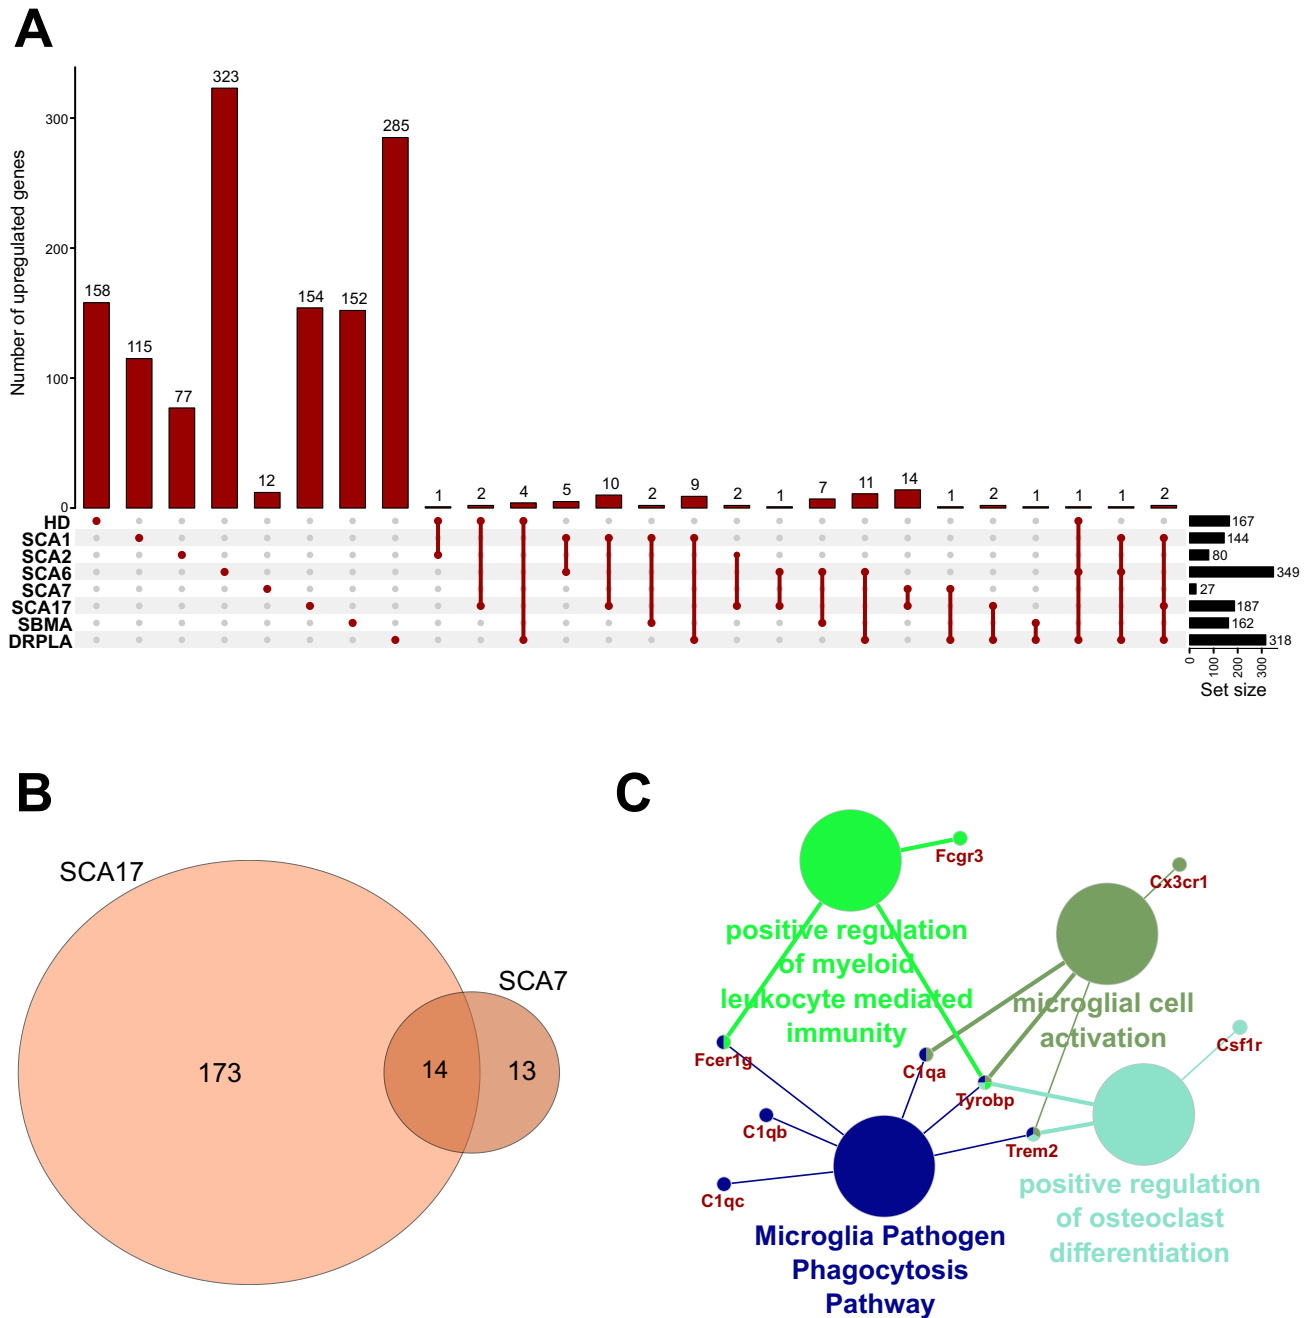

**FIG. 3.** Overlap of significantly upregulated genes from mice transcriptomic data from different PolyQ diseases. (A) UpsetR analysis was used to see the overlap between upregulated genes identified in different PolyQ diseases. (B) Venn diagrams visualizing the overlap between genes upregulated in SCA7 and SCA17. (C) ClueGO analysis for genes commonly upregulated in SCA7 and SCA17.
